1 **Sampling strategy optimization to increase statistical power in**  
2 **landscape genomics: a simulation-based approach**

3

4 **Running title: Sampling strategy in landscape genomics**

5

6

7 Oliver Selmoni<sup>1</sup>, Elia Vajana<sup>1</sup>, Annie Guillaume<sup>1</sup>, Estelle Rochat<sup>1</sup>, Stéphane Joost<sup>1</sup>

8

9 <sup>1</sup>Laboratory of Geographic Information Systems (LASIG), School of Architecture, Civil and Environmental Engineering (ENAC),

10 Ecole Polytechnique Fédérale de Lausanne (EPFL), Lausanne, Switzerland

11

12

13

14 **Abstract (250 words max)**

15 An increasing number of studies are using landscape genomics to investigate local adaptation in wild and domestic populations.  
16 The implementation of this approach requires the sampling phase to consider the complexity of environmental settings and the  
17 burden of logistic constraints. These important aspects are often underestimated in the literature dedicated to sampling  
18 strategies.

19 In this study, we computed simulated genomic datasets to run against actual environmental data in order to trial landscape  
20 genomics experiments under distinct sampling strategies. These strategies differed by design approach (to enhance  
21 environmental and/or geographic representativeness at study sites), number of sampling locations and sample sizes. We then  
22 evaluated how these elements affected statistical performances (power and false discoveries) under two antithetical  
23 demographic scenarios.

24 Our results highlight the importance of selecting an appropriate sample size, which should be modified based on the demographic  
25 characteristics of the studied population. For species with limited dispersal, sample sizes above 200 units are generally sufficient  
26 to detect most adaptive signals, while in random mating populations this threshold should be increased to 400 units.  
27 Furthermore, we describe a design approach that maximizes both environmental and geographical representativeness of  
28 sampling sites and show how it systematically outperforms random or regular sampling schemes. Finally, we show that although  
29 having more sampling locations (between 40 and 50 sites) increase statistical power and reduce false discovery rate, similar  
30 results can be achieved with a moderate number of sites (20 sites). Overall, this study provides valuable guidelines for optimizing  
31 sampling strategies for landscape genomics experiments.

32

33

34

35

36 **Keywords**

37 Sampling strategy – landscape genomics – statistical power – false discovery rate – sample size

38

## 39 Introduction

40 Landscape genomics is a subfield of population genomics, with the aim of identifying genetic variation underlying local adaptation  
41 in natural and managed populations (Balkenhol et al., 2017; Joost et al., 2007; Rellstab, Gugerli, Eckert, Hancock, & Holderegger,  
42 2015). The approach consists of analyzing genomic diversity and environmental variability simultaneously in order to detect  
43 genetic variants associated with a specific landscape composition. Studies of this kind usually incorporate an analysis of  
44 population structure, such that neutral genetic variation can be distinguished from adaptive variation (Rellstab et al., 2015). Over  
45 the last few years, the landscape genomic approach is becoming more widely used (see Tab. 1; Balkenhol et al., 2017; Rellstab et  
46 al., 2015). It is being applied to a range of species, including livestock (Colli et al., 2014; Lv et al., 2014; Pariset, Joost, Marsan, &  
47 Valentini, 2009; Stucki et al., 2017; Vajana et al., 2018), wild animals (Harris & Munshi-South, 2017; Manthey & Moyle, 2015;  
48 Stronen et al., 2015; Wenzel, Douglas, James, Redpath, & Piertney, 2016), insects (Crossley, Chen, Groves, & Schoville, 2017;  
49 Dudaniec, Yong, Lancaster, Svensson, & Hansson, 2018; Theodorou et al., 2018), plants (Abebe, Naz, & Léon, 2015; De Kort et al.,  
50 2014; Pluess et al., 2016; Yoder et al., 2014) and aquatic organisms (DiBattista et al., 2017; Hecht, Matala, Hess, & Narum, 2015;  
51 Laporte et al., 2016; Riginos, Crandall, Liggins, Bongaerts, & Tremblay, 2016a; Vincent, Dionne, Kent, Lien, & Bernatchez, 2013).

52 Sampling strategy plays a pivotal role in experimental research, and must be theoretically tailored to the aim(s) of a study (Rellstab  
53 et al., 2015; Riginos et al., 2016). In the context of landscape genomics, the sampling design should cover a spatial scale  
54 representative of both the demographic processes and the environmental variability experienced by the study population  
55 (Balkenhol et al., 2017; Leempoel et al., 2017; Manel et al., 2010; Rellstab et al., 2015). This is imperative to be able to properly  
56 account for the confounding effect of population structure, to provide a biologically meaningful contrast between the  
57 environmental variables of interest and to definitely allow the search for actual adaptive variants (Balkenhol et al., 2017; Manel  
58 et al., 2010; Rellstab et al., 2015). Consequently, extensive field sampling is generally required and needs to be coupled with high-  
59 throughput genome sequencing to characterize samples at a high number of loci (Balkenhol et al., 2017; Rellstab et al., 2015).

60 Beyond these theoretical aspects, pragmatic choices need to be made with regards to financial and logistic constraints that are  
61 often imposed (Manel et al., 2010; Rellstab et al., 2015). A sampling strategy is constituted of: i) sampling design (the spatial  
62 arrangement of the sampling locations, D); ii) the number of sampling locations (L); and iii) sample size (the number of individuals  
63 sampled, N; Tab. 1). The care with which these parameters are defined affects the scientific output of an experiment as well as  
64 its costs (Manel et al., 2010; Rellstab et al., 2015).

65 The landscape genomics community has traditionally focused on formulating theoretical guidelines for collecting individuals  
66 throughout the study area. In this literature, particular emphasis has been placed on how spatial scales and environmental

67 variation should be accounted for when selecting sampling sites (Leempoel et al., 2017; Manel et al., 2010; Manel et al., 2012;  
68 Rellstab et al., 2015; Riginos et al., 2016). Theoretical simulations have shown that performing transects along environmental  
69 gradients or sampling pairs from contrasting sites which are spatially close reduced false discovery rates caused by demographic  
70 processes confounding effects (De Mita et al., 2013; Lotterhos & Whitlock, 2015). However, in these studies the environment was  
71 described using a single variable, which oversimplifies the choice of sampling sites. In fact, in a real landscape genomics  
72 application, several variables are usually analyzed in order to explore a variety of possible environmental pressures causing  
73 selection (Balkenhol et al., 2017). The concurrent use of several environmental descriptors also allows to control for the bias  
74 associated with collinear conditions (Rellstab et al., 2015). Furthermore, these studies focused on the comparison of different  
75 statistical methods with the drawback of confronting only a few combinations of the elements determining the sampling strategy  
76 (De Mita et al., 2013; Lotterhos & Whitlock, 2015). Last but not least, the number of samples used in the simulations (between  
77 540 and 1800; Lotterhos & Whitlock, 2015) appear to be unrealistic for use in most of real landscape genomic experiments (Tab.1)  
78 and thus the guidelines proposed are scarcely applicable in practice.

79 For these reasons, there is a need to identify pragmatic and realistic guidelines such that a sampling strategy is designed to  
80 maximize statistical power, minimize false discoveries, and optimize efforts and money expenses (Balkenhol et al., 2017; Rellstab  
81 et al., 2015). In particular, the fundamental questions that need to be addressed are: i) how to determine the spatial arrangement  
82 of sampling locations; ii) how to organize sampling effort (for instance preferring many samples at few sites, or rather fewer  
83 samples at many sites); and iii) how many samples are required to obtain sufficient statistical power (Rellstab et al., 2015; Riginos  
84 et al., 2016).

85 In this paper, we investigate how the outcome of landscape genomic analyses is driven by the sampling strategy. We ran  
86 simulations using a fictive genetic dataset encompassing adaptive genotypes shaped by real environmental variables. The  
87 simulations accounted for antithetic demographic scenarios encompassing strong or weak population structure. We proposed  
88 sampling strategies that differed according to three elements: sampling design approach (D), number of sampling locations (L)  
89 and sample size (number of samples, N). For each of these three elements, we measured their relative impacts on the analyses'  
90 true positive rates (TPR) and false discovery rates (FDR), as well as their impact on the predictive positive value (PPV; Marshall,  
91 1989) of the strongest adaptive signals.

92

93 **Material & Methods**

94 The iterative approach we designed to test the different sampling strategies required that a new genetic dataset encompassing  
95 neutral and adaptive variation was created at every run of the simulations. A simulated genomic dataset can be constructed by  
96 means of software performing coalescent (backward-in-time) or forward-in-time simulations (Carvajal-Rodríguez, 2008).  
97 However, methods using coalescent simulations (for ex. SPLATCHE2; Ray, Currat, Foll, & Excoffier, 2010) did not match our needs  
98 as they cannot compute complex selective scenarios (for instance those involving multiple environmental variables; Carvajal-  
99 Rodríguez, 2008). We could not use forward-in-time methods either, as they are slow and therefore not compatible with the  
100 computational requirements of our simulative approach (Carvajal-Rodríguez, 2008). For these reasons, we developed a  
101 customized framework in the R environment (version 3.3.1; R Core Team, 2016) to compute both neutral and adaptive genetic  
102 variation based on gradients of population membership and environmental variations, respectively (Fig. 1). Prior to running the  
103 simulations across the complete dataset (the multivariate environmental landscape of Europe), we tested our approach on a  
104 reduced dataset and compared it to a well-established forward-in-time simulation software (CDPOP, version 1.3; Landguth &  
105 Cushman, 2010). This step allowed us to define the optimal parameters required to simulate two types of demographic scenarios:  
106 panmictic (no dispersal constraints, random mating) and structured (dispersal and mating limited by distance).  
107 We then proceeded with the simulations on the environmental dataset of Europe. At each iteration, a new genetic background  
108 encompassing neutral and adaptive variation was computed (Fig. 1 steps 1 and 2). Subsequently, a sampling strategy was applied  
109 as a combination of sampling design (D), number of sampling locations (L) and sample size (N) (Fig. 1, steps 3, 4 and 5), resulting  
110 in the generation of a genetic dataset that, coupled with environmental data, underwent a landscape genomics analysis (Fig. 1,  
111 step 6). At the end of each iteration, three diagnostic parameters were calculated: true positive rate (TPR, *i.e.* statistical power)  
112 and false discovery rate (FDR) for the analysis, as well as the predictive positive value (PPV) of the strongest genotype-  
113 environment associations (Fig. 1, step 7).  
114 At the end of the simulations, we analyzed how each element of sampling strategy (D, L, N) affected the rates of the three  
115 diagnostic parameters (TPR, FDR, PPV) under the two demographic scenarios (with or without dispersal constraints). All scripts  
116 and data used to perform this analysis are publicly available on Dryad (doi:10.5061/dryad.m16d23c).

117

#### 118 *Environmental data*

119 As a base for our simulations, we quantified the environmental settings of Europe (Fig. S1). We retrieved eight climatic variables  
120 from publicly available sources (annual mean temperature, mean diurnal range, temperature seasonality, mean temperature of  
121 wettest quarter, annual precipitation, precipitation seasonality, precipitation of warmest quarter and altitude; Tab S1; Hijmans,

122 Cameron, Parra, Jones, & Jarvis, 2005; Ryan et al., 2009). In order to work on a relevant geographical scale (Leempoel et al., 2017)  
123 while maintaining an acceptable computational speed, the landscape was discretized into grid cells of 50x50 km, using QGIS  
124 toolbox (version 2.18.13; QGIS development team, 2009). This resulted in 8,155 landscape sites. Average values of environmental  
125 variables were computed for each cell of the landscape using the QGIS zonal statistics tool.

126

### 127 *Computation of genotypes*

128 For the creation of the genotype matrices, we developed an R-pipeline based on probability functions to compute genotypes  
129 from population membership coefficients and environmental values (Box S1). The theoretical fundamentals of this method are  
130 based on the observation that when the population is structured, neutral alleles tend to show similar spatial patterns of  
131 distribution (a feature commonly exploited in Fst outlier tests; Luikart et al., 2003; and principal component analyses of genotype  
132 matrices; Novembre et al., 2008). Conversely, when a marker is under selection, its genotypic/allelic frequencies correlate with  
133 the environmental variable of interest (this is the basic concept of Landscape Genomics; see Balkenhol et al., 2017). For every  
134 iteration, 1,000 loci are computed: 10 are set to “adaptive”, while the remaining 990 to “neutral”. They are computed as follows:

135 - Neutral markers (Box S1a): a parameter ( $m$ ) is set to define the number of population membership gradients used in  
136 the simulations, where higher values of  $m$  result in more complex population structures. Every population membership  
137 gradient is simulated by randomly picking one to five landscape locations to represent the center of the gradient. For  
138 each landscape location, the geographical distance to the gradient centers (calculated using the R *dist* function)  
139 constitutes the membership coefficient. Next, a linear transformation converts this coefficient (Fig. S1) for each  
140 sampling site into the probability of carrying a private allele for the population described ( $pA/PS$ ). A second parameter  
141 ( $c$ , Box. S2) define this transformation, with values between 0.5 (random population structure) and 0 (strong population  
142 structure). The probability of  $pA/PS$  is then used to draw (using the R-stat *sample* function) the bi-allelic genotype for  
143 each individual. This procedure is re-iterated for every neutral locus assigned to a specific population membership  
144 coefficient. Each of the 990 neutral loci is then assigned to one of the  $m$  population membership coefficients (probability  
145 of assignment equal to  $\frac{(1-c)}{\sum_{i=1}^m(1-c_i)}$ ) using the R *sample* function.

146 - Adaptive markers (Box S1b): the probability of carrying an adaptive allele ( $pA/Env$ ) is calculated through a linear  
147 transformation of a specific environmental gradient. This transformation is defined by two parameters. The first  
148 parameter ( $s_1$ ) determines the amplitude of the transformation, and ranges between 0 (strong selective response) and  
149 0.5 (neutral response; Box S2). The second parameter ( $s_2$ ) shifts the baseline for allele frequencies, and ranges between

150 -0.2 and 0.2 (weakening and strengthening the selective response, respectively; Box S2). Each of the ten adaptive loci  
151 are randomly associated with one environmental variable. This implies that some environmental conditions can be  
152 associated with several genetic markers, while others with none. For every adaptive locus, the bi-allelic genotype is  
153 drawn (using the R-stat *sample* function) out of  $pA/Env$ .

154

#### 155 *Evolutionary scenarios and parametrization*

156 Two distinct demographic scenarios were chosen for this study: one involving a population that is not genetically structured  
157 (hereafter referred to as the “panmictic population scenario”), and one involving a structured population (hereafter referred to  
158 as the “structured population scenario”; see Box S2). In order to define the values of parameters  $m$ ,  $c$ ,  $s_1$  and  $s_2$  that allow the  
159 production of these two demographic scenarios, we ran a comparison of our customized simulation framework against  
160 simulations obtained using a well-established forward-in-time simulation software for landscape genetics called CDPOP (version  
161 1.3; Landguth & Cushman, 2010).

162 This comparison was performed on a reduced dataset composed of a 10-by-10 cell grid, covered with two dummy environmental  
163 variables extracted from the bioclim collection (Hijmans et al., 2005; Fig. S1a, b). Each cell could host up to 5 individuals, where  
164 each individual was characterized at 200 SNPs. In this set-up, we ran CDPOP using two distinct settings: the first that allowed for  
165 completely random dispersal and mating movements of individuals (*i.e.* panmictic population scenario), while the second setting  
166 restricted movements to neighboring cells using a dispersal-cost based on distance (*i.e.* structured population scenario). In both  
167 scenarios, we applied identical mortality constraints related to the two environmental variables, and set for each of them a  
168 genetic variant modulating fitness (Fig. S1c, d). Fitness responses were constructed on an antagonistic pleiotropy model (*i.e.*  
169 adaptive tradeoffs, Lowry, 2012), using different intensities to represent moderate (Fig. S1c) and strong selective constraints  
170 (Fig. S1d). The following default CDPOP parameters were employed for the remaining settings: five age classes with no sex-  
171 specific mortality, reproduction was sexual and with replacement, no genetic mutations, epistatic effects or infections were  
172 allowed. The simulations ran for 100 generations and ten replicates per demographic scenario were computed.

173 In parallel, we ran our customized algorithm to compute genotypes, using the same simplified dataset as above. We iteratively  
174 tested all the possible combinations (hereafter referred to as “simulative variants”) of the parameters  $m$  (values tested: 1, 5, 10,  
175 15, 20, 25),  $c$  (all possible ranges tested between: 0.1, 0.2, 0.3, 0.4, 0.5),  $s_1$  (values tested: 0, 0.1, 0.2, 0.3, 0.4, 0.5) and  $s_2$  (values  
176 tested: -0.2, -0.1, 0, 0.1, 0.2), and replicated each combination ten times. Following this, we investigated which of the simulative

177 variants provided the closest match with the allele frequencies observed in the CDPOP runs. The comparisons were based on  
178 three indicators of neutral structure:

- 179 1) Principal component analysis (PCA) of the genotype matrix (Fig. 2a): a PCA of the genotype matrix was performed  
180 using the *prcomp* R function for each simulation (of both the CDPOP and the present customized method), where  
181 the differential of the variation explained by each principal component was then calculated. When the population  
182 is structured, the first principal component usually shows strong differences in the percentage of explained  
183 variation compared with the other components (Novembre et al., 2008). In contrast, when the population  
184 structure is absent, minor changes in this differential value emerge. The curve describing this differential value  
185 was then used for a pairwise comparison between the ten replicates of each CDPOP scenario and the ten replicates  
186 of each simulative variant (from the customized method). The curves were compared by calculating the root mean  
187 square error (RMSE), then the average RMSE was used to rank simulative variants.
- 188 2) F statistic ( $F_{st}$ ; Fig. 2b): five areas, which spanned four cells each, were selected to represent subpopulations of  
189 the study area. Four areas located at the four corners of the 10-by-10 cell grid and the fifth located at the center.  
190 For each simulation, we computed the pairwise  $F_{st}$  (Weir & Cockerham, 1984) between these sub-populations  
191 using the *hierfstat* R package (version 0.04; Goudet, 2005). An  $F_{st}$  close to 0 indicates the absence of a genetic  
192 structure between sub-populations, while under a structured scenario this value tends to raise (Luikart et al.,  
193 2003). The distribution of all the  $F_{st}$  values for the ten CDPOP replicates were compared to the distribution of the  
194  $F_{st}$  of ten replicates of each simulative variant using the Kullback-Leibler Divergence (KLD; Kullback & Leibler, 1951)  
195 analysis implemented in the *LaplacesDemon* R package (version 16.1.1; Statisticat & LCC, 2018). KLD was then used  
196 to rank simulative variants.
- 197 3) Mantel test (Fig. 2c): for each simulation, we computed the genetic and geographic distance between all  
198 individuals of the population applying the R *dist* function to the genotype matrix and the coordinates, respectively.  
199 Next, we calculated the Mantel correlation (mR; Mantel, 1967) between these two distance matrices using the  
200 *mantel.rtest* function implemented in the *ade4* R package (version 1.7, Dray & Dufour, 2007). When mR is close  
201 to 0, it indicates the absence of correlation between the genetic and geographical distances, suggesting the  
202 absence of genetic structure (*i.e.* panmictic population scenario). In contrast, an mR closer to -1 or +1 indicates  
203 that genetic distances match geographic distances, as we would expect in a structured population scenario



204 (Mantel, 1967). The average mR was calculated for each simulative variant and compared to the average mR  
205 measured in the two CDPOP scenarios. The resulting difference in mR ( $\Delta mR$ ) was used to rank simulative variants.  
206 The three ranking coefficients (RMSE, KLD and  $\Delta mR$ ) were scaled using the *scale* R function and averaged, and the resulting value  
207 was used to rank simulative variants. In this way, it was possible to find one simulative variant with the best ranking when  
208 compared to the CDPOP panmictic population scenario, and another with the best ranking when compared to the CDPOP  
209 structured population scenario. These two simulative variants provided the values of  $m$  and  $c$  for the simulations on the complete  
210 dataset.

211 Subsequently, we focused on the comparison of the values for the parameters defining the adaptive processes:  $s_1$  and  $s_2$ . For  
212 each CDPOP demographic scenario, we searched for the  $s_1$  and  $s_2$  combination that resulted in a simulative variant that best  
213 matched the allelic frequencies of each of the two genotypes implied in selection (moderate and strong). The environmental  
214 variable of interest was distributed in 20 equal intervals and within each interval the allelic frequencies of the adaptive genotype  
215 were computed. This resulted in the computation of a regression line for each simulation that described the allelic frequency of  
216 the adaptive genotype as a function the environmental variable causing the selective constraint (Fig. 2d-e). Next, we calculated  
217 the RMSE to compare this regression line between the CDPOP scenarios and the respective simulative variant (*i.e.* those with the  
218 optimal  $m$  and  $c$  according to the previous analyses) under different  $s_1$  and  $s_2$  combinations. For the two demographic scenarios,  
219 the ranges of  $s_1$  and  $s_2$  were ranked according to RMSE to represent a moderate to strong selection in the simulations for the  
220 complete dataset.

221

### 222 *Sampling design*

223 Four types of sampling design are proposed: three of them differently account for the characteristics of the landscape while one  
224 randomly selects the sampling locations. The first is “geographic” (Fig. 3a) and is defined through a hierarchical classification of  
225 the sites based on their geographic coordinates. The desired number of sampling locations ( $L$ ) determines the number of clusters  
226 and the geographical center of each cluster is set as a sampling location. The goal of this strategy is to sample sites located as far  
227 apart as possible from each other in the geographical space to guarantee spatial representativeness.

228 The second design type is “environmental” (Fig. 3b). It is based on the computation of distances depending on the values of  
229 environmental variables. The latter are first processed by a correlation filter: when two variables are found correlated to each  
230 other ( $R > \pm 0.5$ ), one of them (randomly chosen) is excluded from the dataset. The remaining un-correlated descriptors are scaled  
231 ( $sd=1$ ) and centered ( $mean=0$ ) using R *scale* function. The scaled values are used to perform a hierarchical clustering between the

232 landscape sites. Like the previous design, the desired number of sampling locations ( $L$ ) defines the number of clusters. For each  
233 cluster, the environmental center is defined by an array containing the mean of the scaled environmental values. Then, the  
234 Euclidean distances between this array and the scaled values of each site of the cluster are computed. On this basis, the most  
235 similar sites to each center are selected as sampling locations. This strategy aims to maximize environmental contrast between  
236 sampling locations and thus favors the detection of adaptive signals (Manel et al., 2012; Riginos et al., 2016).

237 The third design is “hybrid” (Fig. 3c) and is a combination of the first two. It consists of dividing the landscape into  $k$  environmental  
238 regions and selecting within each of these regions two or more sampling locations based on geographic position. Initially, the  
239 environmental variables are processed as for the environmental design (correlation-filter and scaling) and used for the  
240 hierarchical classification of the landscape sites. The next step is separating the landscape sites in  $k$  environmental regions based  
241 on this classification. The allowed value of  $k$  ranges between 2 and half of the desired number of sampling locations ( $L$ ). We use  
242 the R package NbClust (version 3.0, Charrad, Ghazzali, Boiteau, & Niknafs, 2015) to find the optimal value of  $k$  within this range.  
243 The optimal  $k$  is then used to determine the  $k$  environmental regions. Next, the number of sampling locations ( $L$ ) is equally divided  
244 across the  $k$  environmental regions. If  $k$  is not an exact divisor of  $L$ , the remainder of  $L/k$  is randomly assigned to environmental  
245 regions. The number of sampling locations per environment region ( $L_{ki}$ ) can therefore be equal among environmental regions or,  
246 at worst, differ by one (for ex. if  $L=8$  and  $k=4$ :  $L_{k1}=2$ ,  $L_{k2}=2$ ,  $L_{k3}=2$ ,  $L_{k4}=2$ ; if  $L=10$  and  $k=4$ :  $L_{k1}=3$ ,  $L_{k2}=3$ ,  $L_{k3}=2$ ,  $L_{k4}=2$ ). Sampling  
247 locations within environmental regions are chosen based on geographical position. Geographical clusters within each  
248 environmental region are formed as in the geographic design, setting  $L_{ki}$  as the number of clusters. The landscape site spatially  
249 closer to the center of each geographical cluster is selected as sampling location. In such a way, the procedure allows the  
250 replication of similar environmental conditions at distant sites, being therefore expected to disentangle neutral and adaptive  
251 genetic variation and to promote the detection of variants under selection (Manel et al., 2012; Rellstab et al., 2015; Riginos et al.,  
252 2016).

253 The fourth type of design is “random”: the sampling locations ( $L$ ) are randomly selected across all the available landscape sites.  
254 In our simulations, we tested each type of sampling design with numbers comparable to the ones used in real experiments (see  
255 Tab. 1). We used 5 levels of sampling locations  $L$  (5, 10, 20, 40 and 50 locations) and 6 of sample sizes  $N$  (50, 100, 200, 400, 800  
256 and 1600 individuals). In iterations for which the sample size is not an exact multiple of the number of sites (for ex., 20 sites and  
257 50 individuals), the total number of individuals was changed to the closest multiple (here 40 individuals). The scripts including  
258 these procedures were written in R using the functions embedded within the *stats* package (R Core Team, 2016).

259

260 *Landscape genomics analysis*

261 We computed association models for each iteration with the SamBada software (version 0.6.0; Stucki et al., 2017). First, the  
262 simulated matrix of genotypes is filtered through a customized R function with minor allele frequency <0.05 and major genotype  
263 frequency >0.95 to avoid including rare or monomorphic alleles and genotypes, respectively. Secondly, a principal component  
264 analysis (PCA) is run on the filtered genotype matrix to obtain synthetic variables accounting for population structure (hereafter  
265 referred to as population structure variables; Patterson, Price, & Reich, 2006). The analysis of the eigenvalues of the PCA is carried  
266 out in order to assess whether the population structure is negligible for downstream analysis or not (Patterson et al., 2006). At  
267 each iteration, the algorithm runs a Tracy-Widom significance test of the eigenvalues, as implemented in the AssocTests R  
268 package (version 0.4, Wang, Zhang, Li, & Zhu, 2017). Significant eigenvalues indicate the presence of non-negligible population  
269 structure: in these situations, the corresponding principal components will be used as co-variables in the genotype-environment  
270 association study.

271 After filtering, SamBada is used to detect candidate loci for local adaptation. The software is able to run multivariate logistic  
272 regression models (Joost et al., 2007) that include population structure as a co-variable, while guaranteeing fast computations  
273 (Duru et al., 2019; Rellstab et al., 2015; Stucki et al., 2017). To ensure compatibility with our pipeline and increase computational  
274 speed, we integrated the SamBada method into a customized python script (version 3.5; van Rossum, 1995) based on the Pandas  
275 (McKinney, 2010), Statsmodels (Seabold & Perktold, 2010) and Multiprocessing (Mckerns, Strand, Sullivan, Fang, & Aivazis, 2011)  
276 packages. *P*-values related to the two statistics (G-score and Wald-score) associated with each association model are computed  
277 and subsequently corrected for multiple testing using the R *q-value* package (version 2.6; Storey, 2003). Models are deemed  
278 significant when showing a  $q < 0.05$  for both tests. When multiple models are found to be significant for the same marker, only  
279 the best one is kept (according to the G-score). The pipeline was developed in the R-environment using the *stats* library.

280

281 *Simulations and evaluation of the performance*

282 Each combination of demographic scenarios, sampling designs, number of sampling locations and sample sizes was replicated 20  
283 times for a total of 4,800 iteration (Tab. 2). A new genetic matrix was randomly redrawn for each iteration to change the selective  
284 forces implying local adaptation and the demographic set-up determining the neutral loci. At the end of each iteration, three  
285 diagnostic parameters were computed:

- 286 - True Positive Rate of the analysis (TPR or statistical power): percentage of true associations detected to be significant;  
287 - False Discovery Rate of the analysis (FDR): percentage of false association among the significant ones;

288 - Positive Predictive Value (PPV; Marshall, 1989) of the ten strongest associations: significant associations were sorted  
289 according to the association strength ( $\beta$ , the value of the parameter associated to environmental variable in the logistic  
290 model). PPV represents the percentage of true associations among the best ten associations according to  $\beta$ .

291 After the simulations, an analysis of ranks (Kruskal-Wallis test; Kruskal & Wallis, 1952) was performed using the *kruskal.test* R  
292 function to test whether TPR, FDR and PPV were significantly influenced ( $p < 0.01$ ) by each of the three elements underlying the  
293 sample strategy (*i.e.* sampling design, number of sampling locations and sample size; Tab. 2). Contextually, we computed the  
294 epsilon-squared ( $E^2$ ) coefficient (as implemented in the *rcompanion* R package, version 2.2.1; Mangiafico, 2019) that quantifies,  
295 on a scale from 0 to 1, the influence of each sampling element on the three diagnostic parameters (Tomczak & Tomczak, 2014).  
296 Finally, we calculated the changes in the median values of TPR, FDR and PPV across the levels of each element underlying the  
297 sample strategy. In the case of numerical elements (*i.e.* number of sampling locations and sample size), we quantified the changes  
298 in TPR, FDR and PPV along with the increments of the ordinal factor levels (for ex.: the TPR median increase between sample sizes  
299 of 100 to 200, 200 to 400, 400 to 800, etc.). In the case of sample design, where the factor levels are not ordinal, we compared  
300 each design approach against a random sampling scheme.

301

## 302 **Results**

### 303 *Parameters of simulations*

304 For the panmictic population scenario, the simulative variant best matching the CDPOP results was obtained with the coefficients  
305  $m = 1$  and  $c = 0.5$ , whereas for the structured population scenario, the simulative variant was best at  $m = 10$  and  
306  $c = Unif(0.2, 0.4)$  (Fig. 2a-c, Box S2, Tab. S2a-b). In the panmictic population scenario, we found that the moderate selection  
307 case was best emulated by  $s_1 = 0.4$  and  $s_2 = -0.2$  and the strong selection by  $s_1 = 0.3$  and  $s_2 = +0.1$ . In the structured  
308 population scenario, the moderate selection found its best match in the simulative variant with  $s_1 = 0$  and  $s_2 = -0.1$  while the  
309 strong selection in the one set with  $s_1 = 0$  and  $s_2 = +0.2$  (Fig. 2d-e, Box S2, Tab. S2c-d).

310

### 311 *True Positive Rate*

312 In general, the panmictic population scenario simulations showed higher TPR ( $Mdn_{PAN}=40\%$  [IQR=0-90%]) than simulations  
313 performed under the structured population scenario ( $Mdn_{STR}=0\%$  [IQR=0-40%]; Fig. 4a-c). For both scenarios, the main influence  
314 on TPR was found to be sample size ( $E^2_{PAN}=0.815$ ,  $E^2_{STR}=0.613$ ; Tab. 3c). Smaller sample sizes ( $N= 50, 100$ ) resulted in TPR close or  
315 equal to zero for both demographic scenarios (Fig. 4c, Tab. S3c). Under the structured population scenario, an increase of TPR

316 started from N=200 (Tab. S3c), leading to an initial increase of 5% of the median TPR for every 10 additional samples. At N=400,  
317 this increment progressively became less abrupt until reaching a maximal value at N=800 (Mdn=100% [IQR=60-100%]; Fig. 4c;  
318 Tab. S3c). By comparison, the panmictic population scenario showed an increase in TPR starting at N=400, with a more constant  
319 and less abrupt rate of increase (Fig. 4c, Tab. S3c). Under this scenario, a N=1600 was not sufficient to yield maximal TPR  
320 (Mdn=80% [IQR=60-90%]; Fig. 4c).

321 The effect of number of sampling locations on TPR was significant, even though weaker than the effect of sample size  
322 ( $E^2_{PAN}=0.008$ ,  $E^2_{STR}=0.17$ ; Tab. 3a; Fig. 4b). Under the panmictic population scenario in particular, an increase in the number of  
323 sampling locations did not change the median TPR, but its inter-quartile range (Fig. 4b, Tab. S3b). Conversely, TPR was affected  
324 by the number of sampling locations under the structured population scenario (Fig. 4b, Tab. S3b). This effect was particularly  
325 evident between L=5 and L=10, where additional sampling sites led to an increase of the median TPR by 10% (Tab. S3b). At higher  
326 numbers of sampling sites (L=20, 40 and 50) the incremental rate of TPR was less evident but still positive (Tab. S3b).

327 Similar to the influence of sampling locations, the type of sampling design had a minor effect on TPR when compared to the effect  
328 that sample size had ( $E^2_{PAN}=0.0163$ ,  $E^2_{STR}=0.1229$ ; Tab. 3a; Fig. 4a). When compared to the random approach, a hybrid design  
329 approach was seen to increase the median TPR by 10% and 30% under panmictic and structured population scenarios,  
330 respectively (Fig. 4a, Tab S3a). The two other design approaches only affected median TPR for the structured population scenario;  
331 compared to a random sampling scheme, the environmental design increased TPR by 30%, while the geographical design  
332 decreased TPR by 10% (Fig. 4a, Tab. S3a).

333

### 334 *False Discovery Rate*

335 False discoveries generally appeared at a higher rate under a panmictic population scenario (Mdn<sub>PAN</sub>=100% [IQR=20-100%]) than  
336 under a structured population scenario (Mdn<sub>STR</sub>=63% [IQR=20-100%]; Fig. 4d-f). Sample size had the greatest effect on FDR for  
337 both population scenarios ( $E^2_{PAN}=0.621$ ,  $E^2_{STR}=0.408$ ; Tab. 3f; Fig. 4f). For the panmictic population scenario, median FDR was  
338 100% at smaller sample sizes (N=50, 100 and 200; Fig. 4f), but between N=200 and N=400, the FDR began to decrease by 2.6%  
339 for every ten additional samples taken (Tab. S3c). The reduction in FDR was less abrupt after N=400, and null after N=800 (Tab.  
340 S3c). At N=1600, median FDR was 20% [IQR=10-30%] (Fig. 4f). The structured population scenario produced a different pattern:  
341 the largest median FDR was found at smaller sample sizes (N=50 and 100), before a steep decrease was observed closer to N=200  
342 (Fig. 4f, Tab. S3c). At larger sample sizes (N=400, 800, 1600), FDR showed a logarithmic increase in growth rate where, at its most

343 abrupt (between  $N=200$  and  $400$ ), there was an increase of  $0.8\%$  FDR for every ten additional samples (Fig. 4f, Tab. S3c). For the  
344 structured population scenario,  $N=1600$  resulted in a median FDR of  $68\%$  [IQR= $57-82\%$ ].

345 The effect of sampling location number on FDR was significant, albeit weaker than the effect of sample size on FDR, under both  
346 population scenarios ( $E^2_{PAN}=0.012$ ,  $E^2_{STR}=0.127$ ; Tab. 3e, Fig. 4e). Similar to the pattern for TPR, the number of locations sampled  
347 under the panmictic population scenario did not alter the median FDR, but rather its inter-quartile range (Fig. 4e). By contrast,  
348 the structured population scenario showed a decrease of median FDR along with the increment of the number of sampling  
349 locations (Fig. 4e, Tab. S3b). This decrease was more abrupt increasing from  $5$  to  $10$  sampling locations, where additional sites  
350 led to a median FDR reduction of  $6\%$ , than between higher numbers of sampling locations ( $L=20, 40, 50$ ; Tab. S3b).

351 Sampling design only showed a significant effect on false discovery rates under the structured population scenario, but it was not  
352 as strong as the influences of sample size and sampling locations ( $E^2_{STR}=0.007$ ; Tab. 3d, Fig. 4d). When compared to a random  
353 sampling scheme, both the environmental and hybrid sampling schemes showed a decrease in median FDR of  $7\%$ , while the  
354 geographic scheme showed a slight increase in FDR ( $+0.05\%$ ; Fig. 4d, Tab. S3a).

355

#### 356 *Positive Predictive Value*

357 The PPVs of the ten strongest significant associations (hereinafter simply referred to as PPV) was generally higher under the  
358 structured population scenario ( $Mdn_{PAN}=70\%$  [IQR= $0-100\%$ ]) than under the panmictic population scenario ( $Mdn_{PAN}=0\%$  [IQR= $0-80\%$ ]; Fig. 4g-i). As with TPR and FDR, sample size had the strongest influence on PPV under both population scenarios ( $E^2_{PAN}=0.63$ ,  
359  $E^2_{STR}=0.381$ ; Tab. 3i, Fig. 4i). Under the panmictic population scenario, median PPV was  $0\%$  for the smaller sample sizes ( $N=50$ ,  
360  $100$  and  $200$ ; Fig. 4i), after which patterns of increase were observed: from  $N=200$  to  $400$  there was an increase of PPV of  $2.6\%$   
361 for every  $10$  additional samples, and from  $N=800$  to  $1600$  PPV continued to increase though it was less abrupt, resulting in a  
362 median PPV of  $88\%$  [IQR= $75-100\%$ ] at  $N=1600$  (Fig. 4i, Tab. S3c). Under the structured population scenario, fewer samples were  
363 required to observe a similar increment: while median PPV was  $0$  for  $N=50$  and  $N=100$ , from  $N=100$  to  $N=200$  the median PPV  
364 increased by  $8.4\%$  for every ten additional samples (Fig. 4i, Tab. S3c). The increment of PPV became gradually weaker when  
365 transitioning between higher levels ( $N=400, 800$  and  $1600$ ) and led to a median PPV of  $100\%$  [IQR= $57.5-100\%$ ] at  $N=1600$ .

367 Similar to TPR and FDR, the effect of sampling location number on PPV was significant but weaker than when compared to the  
368 effect of sample size ( $E^2_{PAN}=0.0124$ ,  $E^2_{STR}=0.19$ ; Tab. 3h, Fig. 4h). This effect was particularly evident under the structured  
369 population scenario, where an increase of the number of sampling locations strongly raised median PPV (Fig. 4h). The strongest  
370 PPV increment was observed between  $L=5$  and  $10$ , where each additional sampling location raised the median PPV by  $13\%$

371 (Fig. 4h, Tab. S3b). With more sampling locations ( $L=20, 40$  and  $50$ ) the rate of increase of PPV remained but was weaker (Fig. 4h,  
372 Tab. S3b). In the panmictic population scenario, an increase in the number of sampling locations affected the inter-quartile range  
373 of PPV in particular, but not the medians (Fig. 4h).

374 The sampling design used resulted in rate changes for PPV under the structured population scenario, despite being less strong  
375 than when compared to the other elements ( $E^2_{STR}=0.0264$ ; Tab. 3g, Fig. 4g). When compared to a random sampling scheme, the  
376 hybrid design and the environmental design increased the median PPV by 24% and 20% respectively, while the geographic design  
377 did not result in any changes (Fig. 4g, Tab. S3a).

378

## 379 Discussion

380 The simulations presented in this study highlight that sampling strategy clearly drives the outcome of a landscape genomics  
381 experiment, and that the demographic characteristics of the studied species can significantly affect the analysis. Despite some  
382 limitations that will be discussed below, the results obtained make it possible to answer three questions that researchers are  
383 confronted with when planning this type of research investigation.

384

### 385 *How many samples are required to detect any adaptive signal?*

386 In line with the findings of previous studies (e.g. Lotterhos & Whitlock, 2015), our results suggest that sample size is the key factor  
387 in securing the best possible outcome for a landscape genomics analysis. Where statistical power is concerned, there is an  
388 unquestionable advantage in increasing the number of samples under the scenarios tested. When focusing on the panmictic  
389 population scenario, we found a lack of statistical power in simulations for  $N \leq 200$ , while detection of true positives increased  
390 significantly for  $N \geq 400$  (Fig. 4c). As we progressively doubled sample size ( $N=800, 1600$ ), TPR linearly doubled as well (Fig. 4c).  
391 Under the structured population scenario, this increase in statistical power started at  $N \geq 100$  and followed a logarithmic trend  
392 that achieved the maximum power at  $N \geq 800$  (Fig. 4c).

393 These results show that it is crucial to consider the population's demographic background to ensure sufficient statistical power  
394 in the analyses, as advised by several reviews in the field (Balkenhol et al., 2017; Manel et al., 2012; Rellstab et al., 2015). In fact,  
395 the allelic frequencies of adaptive genotypes respond differently to a same environmental constraint under distinct dispersal  
396 modes (Fig. 2d-e). When individual dispersal is limited by distance (structured population scenario), the allelic frequencies of  
397 adaptive genotypes are the result of several generations of selection, resulting in a progressive disappearance of non-adaptive  
398 alleles from areas where selection acts. When the dispersal of individuals is completely random (panmictic population scenario),

399 the same selective force only operates within the last generation, such that even non-adaptive alleles can be found where the  
400 environmental constraint acts. Under these premises, a correlative approach for studying adaptation (such as SamBada) is more  
401 likely to find true positives under a structured population scenario rather than under a panmictic one.

402 The dichotomy between structured and panmictic populations also emerges when analyzing false discovery rates. Under the  
403 panmictic population scenario, increasing the number of individuals sampled reduced FDR, while the inverse pattern was seen  
404 under a structured population scenario (Fig. 4f). The issue of high false positives rates under structured demographic scenarios is  
405 well acknowledged in landscape genomics (De Mita et al., 2013; Rellstab et al., 2015). Population structure results in gradients of  
406 allele frequencies that can mimic and be confounded with patterns resulting from selection (Rellstab et al., 2015). As sample size  
407 increases, the augmented detection of true positives is accompanied by the (mis-)detection of false positives. Under the panmictic  
408 population scenarios, these confounding gradients of population structure are absent (Fig. 2a-c) and high sample sizes accentuate  
409 the detection of true positives only (Fig. 4f).

410 Working with FDR up to 70% (Fig. 4f) might appear excessive, but this should be contextualized in the case of landscape genomics  
411 experiments. The latter constitute the first step toward the identification of adaptive loci, which is generally followed by further  
412 experimental validations (Pardo-Diaz, Salazar, & Jiggins, 2015). Most landscape genomics methods test single-locus effects  
413 (Rellstab et al., 2015). This framework is efficient for detecting the few individual loci that provide a strong selective advantage,  
414 rather than the many loci with a weak individual-effect (for instance those composing a polygenic adaptive trait; Pardo-Diaz et  
415 al., 2015). For this reason, when researchers are faced with a high number of significant associations, they tend to focus on the  
416 strongest ones (Rellstab et al., 2015), as we did here by measuring the PPV of the ten strongest associations. By relying on this  
417 diagnostic parameter, we could show that increasing sample size ensures that the genotypes more strongly associated with  
418 environmental gradients are truly due to adaptive associations (Fig. 4i). Under these considerations, acceptable results are  
419 obtainable with moderate sample sizes: a median PPV of at least 50% was found with simulations with N=400 and N=200 under  
420 panmictic and structured population scenario, respectively.

421 Each landscape genomic experiment is unique in terms of environmental and demographic scenarios, which is why it is not  
422 possible to propose a comprehensive mathematical formula to predict the expected TPR, FDR and PPV based solely on sample  
423 size. When working with a species with a presumed structured population (for instance, wild land animals), we advise against  
424 conducting experiments with fewer than 200 sampled individuals, as the statistical requirements to detect true signals are  
425 unlikely to be met. Panmixia is extremely rare in nature (Beveridge & Simmons, 2006), but long-range dispersal can be observed



426 in many species such as plants (Nathan, 2006) and marine organisms (Riginos et al., 2016). When studying species of this kind, it  
427 is recommendable to increase sample size to at least 400 units.

428

429 *How many sampling sites?*

430 Increasing the number of samples inevitably raises the cost of an experiment, largely resulting from sequencing and genotyping  
431 costs (Manel et al., 2010; Rellstab et al., 2015). Additionally, field work rapidly increases the cost of a study in cases where  
432 sampling has to be carried out across landscapes with logistic difficulties and physical obstacles. Therefore, it is both convenient  
433 and economical to optimize the number of sampling locations to control for ancillary costs.

434 De Mita et al. (2013) suggested that increasing the number of sampling locations would raise power and reduce false discoveries.  
435 The present study partially supports this view. A small number of sampling locations (L=5) was found to reduce TPR and PPV while  
436 increasing FDR, compared to using more sampling locations (L=10, 20, 40 and 50; Fig. 4b, e, h). This is not surprising, because  
437 when sampling at a small number of locations the environmental characterization is likely to neglect some contrasts and ignore  
438 confounding effects between collinear variables (Leempoel et al., 2017; Manel et al., 2010). This was particularly evident under  
439 the structured population scenario (Fig. 4b, e, h). In contrast, we found that higher numbers of sampling locations (L=40 and 50)  
440 provided little benefits in terms of TPR, FDR and PPV, compared to a moderate number of locations (L= 20; Fig. 4b, e, h). These  
441 discrepancies with previous studies are probably due to differences in the respective simulative approaches applied (we use  
442 several environmental descriptors instead of one) and the characteristics of the statistical method we employed to detect  
443 signatures of selection. In fact, as a number of sampling locations is sufficient to portray the environmental contrasts of the study  
444 area, adding more locations does not bring additional information and therefore does not increase statistical power. The  
445 implications of the information described above are considerable since the cost of field work can be drastically reduced with  
446 marginal countereffects on statistical power and false discoveries.

447

448 *Where to sample?*

449 Compared with random or opportunistic approaches, sampling designs based on the characteristics of the study area are  
450 expected to improve the power of landscape genomics analysis (Lotterhos & Whitlock, 2015). We developed three distinct  
451 methods to choose sampling locations accounting for geographical and/or environmental information (geographic,  
452 environmental and hybrid designs). We confronted these design approaches between themselves and with random sampling  
453 schemes. The approach based on geographic position (geographic design) resulted in statistical power similar to the random

454 designs (Fig. 4a, d, f), while those based on climatic data (environmental and hybrid design) displayed remarkably higher TPRs  
455 and PPV and slightly lower FDR (Fig. 4a, d, f). These beneficial effects on the analysis were accentuated under the structured  
456 demographic scenario.

457 These results match previous observations: methods conceived to take advantage of environmental contrasts facilitate the  
458 detection of adaptive signals (Manel et al., 2012; Riginos et al., 2016). Furthermore, the hybrid design prevents the sampling of  
459 neighboring sites with similar conditions, therefore avoiding the superposition between adaptive and neutral genetic variation  
460 (Manel et al., 2012). This is likely to explain why the hybrid design slightly outperformed the environmental approach (Fig. 4a, d, f).  
461 For these reasons, we strongly advise in using a sampling scheme accounting for both environmental and geographical  
462 representativeness. Without bringing any additional cost to the analysis, this approach can boost statistical power of up to 30%  
463 under a complex demographic scenario (Tab. S3a), in comparison to a regular (geographic) or random sampling scheme.

464

#### 465 *Limitation*

466 The preliminary run of comparison with a well-established forward-in-time simulation software (CDPOP) displayed the pertinence  
467 of our customized simulative approach (Fig. 2). The neutral genetic variation appeared as random under the panmictic population  
468 scenario (no skew on the PC graph,  $F_{st}$  close to 0,  $mR$  close to 0) and structured under the structured population scenario (skew  
469 in the PCA graph,  $F_{st}$  higher than 0,  $mR$  different from 0; Fig. 2a-c). Adaptive allele frequencies also matched theoretical  
470 expectations: the responses along the environmental gradients were more stressed under the structured population scenario  
471 than under the panmictic one (Fig. 2d-e).

472 Nonetheless, the use of *forward-in-time* simulations on the complete dataset (used by De Mita et al., 2013; Lotterhos & Whitlock,  
473 2015) would probably have resulted in more realistic scenarios. In order to be used in a framework as the one proposed here,  
474 the *forward-in-time* methods should be compatible with a large number of spatial locations (*i.e.* potential sampling sites),  
475 hundreds of individuals per location and a genetic dataset counting at least one thousand loci, of which 10 set as adaptive against  
476 distinct environmental variables. Importantly, all these requirements should be fulfilled at a reasonable computational speed  
477 (with our method, for instance, genotypes are computed in a few seconds). As far as we know, there are no existing software  
478 meeting these criteria.

479

#### 480 *Conclusions*

481 The present work provides guidelines for optimizing the sampling strategy in the context of landscape genomic experiments. Our  
482 simulations highlight the importance of considering the demographic characteristic of the studied species when deciding the  
483 sampling strategy to be used. For species with limited dispersal, we suggest working with a minimum sample size of 200  
484 individuals to achieve sufficient power for landscape genomic analyses. When species display long-range dispersal, this number  
485 should be raised to at least 400 individuals. The costs induced by a large number of samples can be balanced by reducing those  
486 related to field work. In cases where a moderate number of sampling locations (20 sites) is sufficient to portray the environmental  
487 contrasts of the study area, there is only minimal statistical benefit for sampling a larger number of sites (40 or 50). Furthermore,  
488 we describe an approach for selecting sampling locations while accounting for environmental characteristics and spatial  
489 representativeness, and show its benefic effects on the detection of true positives.

490

#### 491 **Acknowledgements**

492 We thank the anonymous reviewers for the useful comments and suggestions provided during the redaction of this  
493 paper. We acknowledge funding from the IMAGE (Innovative Management of Animal Genetic Resources) project  
494 funded under the European Union's Horizon 2020 research and innovation program under grant agreement No.  
495 677353.

496

#### 497 **References**

- 498 Abebe, T. D., Naz, A. A., & Léon, J. (2015). Landscape genomics reveal signatures of local adaptation in  
499 barley (*Hordeum vulgare* L.). *Frontiers in Plant Science*, 6(October), 813.  
500 <https://doi.org/10.3389/fpls.2015.00813>
- 501 Balkenhol, N., Dudaniec, R. Y., Krutovsky, K. V., Johnson, J. S., Cairns, D. M., Segelbacher, G., ... Joost, S.  
502 (2017). Landscape Genomics: Understanding Relationships Between Environmental Heterogeneity  
503 and Genomic Characteristics of Populations (pp. 1–62). Springer, Cham.  
504 [https://doi.org/10.1007/13836\\_2017\\_2](https://doi.org/10.1007/13836_2017_2)

- 505 Beveridge, M., & Simmons, L. W. (2006). Panmixia: An example from Dawson's burrowing bee (*Amegilla*  
506 *dawsoni*) (Hymenoptera: Anthophorini). *Molecular Ecology*, *15*(4), 951–957.  
507 <https://doi.org/10.1111/j.1365-294X.2006.02846.x>
- 508 Carvajal-Rodríguez, A. (2008). Simulation of genomes: a review. *Current Genomics*, *9*(3), 155–159.  
509 <https://doi.org/10.2174/138920208784340759>
- 510 Charrad, M., Ghazzali, N., Boiteau, V., & Niknafs, A. (2015). NbClust : An R Package for Determining the  
511 Relevant Number of Clusters in a Data Set. *Journal of Statistical Software*, *61*(6), 1–36.  
512 <https://doi.org/10.18637/jss.v061.i06>
- 513 Colli, L., Joost, S., Negrini, R., Nicoloso, L., Crepaldi, P., Ajmone-Marsan, P., ... Zundel, S. (2014). Assessing  
514 the spatial dependence of adaptive loci in 43 European and Western Asian goat breeds using AFLP  
515 markers. *PLoS ONE*, *9*(1), e86668. <https://doi.org/10.1371/journal.pone.0086668>
- 516 Crossley, M. S., Chen, Y. H., Groves, R. L., & Schoville, S. D. (2017). Landscape genomics of Colorado  
517 potato beetle provides evidence of polygenic adaptation to insecticides. *Molecular Ecology*, *26*(22),  
518 6284–6300. <https://doi.org/10.1111/mec.14339>
- 519 De Kort, H., Vandepitte, K., Bruun, H. H., Closset-Kopp, D., Honnay, O., & Mergeay, J. (2014). Landscape  
520 genomics and a common garden trial reveal adaptive differentiation to temperature across Europe  
521 in the tree species *Alnus glutinosa*. *Molecular Ecology*, *23*(19), 4709–4721.  
522 <https://doi.org/10.1111/mec.12813>
- 523 De Mita, S., Thuillet, A.-C., Gay, L., Ahmadi, N., Manel, S., Ronfort, J., & Vigouroux, Y. (2013). Detecting  
524 selection along environmental gradients: analysis of eight methods and their effectiveness for  
525 outbreeding and selfing populations. *Molecular Ecology*, *22*(5), 1383–1399.  
526 <https://doi.org/10.1111/mec.12182>
- 527 DiBattista, J. D., Travers, M. J., Moore, G. I., Evans, R. D., Newman, S. J., Feng, M., ... Berry, O. (2017).

- 528 Seascape genomics reveals fine-scale patterns of dispersal for a reef fish along the ecologically  
529 divergent coast of Northwestern Australia. *Molecular Ecology*, 26(22), 6206–6223.  
530 <https://doi.org/10.1111/mec.14352>
- 531 Dray, S., & Dufour, A.-B. (2007). The **ade4** Package: Implementing the Duality Diagram for Ecologists.  
532 *Journal of Statistical Software*, 22(4), 1–20. <https://doi.org/10.18637/jss.v022.i04>
- 533 Dudaniec, R. Y., Yong, C. J., Lancaster, L. T., Svensson, E. I., & Hansson, B. (2018). Signatures of local  
534 adaptation along environmental gradients in a range-expanding damselfly ( *Ischnura elegans* ).  
535 *Molecular Ecology*, 27(11), 2576–2593. <https://doi.org/10.1111/mec.14709>
- 536 Duruz, S., Sevane, N., Selmoni, O., Vajana, E., Leempoel, K., Stucki, S., ... Joost, S. (2019). Rapid  
537 identification and interpretation of gene-environment associations using the new R.SamBada  
538 landscape genomics pipeline. *Molecular Ecology Resources*, 1755–0998.13044.  
539 <https://doi.org/10.1111/1755-0998.13044>
- 540 Goudet, J. (2005). HIERFSTAT, a package for R to compute and test hierarchical F-statistics. *Molecular*  
541 *Ecology Notes*, 5(1), 184–186. <https://doi.org/10.1111/j.1471-8286.2004.00828.x>
- 542 Harris, S. E., & Munshi-South, J. (2017). Signatures of positive selection and local adaptation to  
543 urbanization in white-footed mice ( *Peromyscus leucopus* ). *Molecular Ecology*, 26(22), 6336–6350.  
544 <https://doi.org/10.1111/mec.14369>
- 545 Hecht, B. C., Matala, A. P., Hess, J. E., & Narum, S. R. (2015). Environmental adaptation in Chinook  
546 salmon ( *Oncorhynchus tshawytscha* ) throughout their North American range. *Molecular Ecology*,  
547 24(22), 5573–5595. <https://doi.org/10.1111/mec.13409>
- 548 Hijmans, R. J., Cameron, S. E., Parra, J. L., Jones, P. G., & Jarvis, A. (2005). Very high resolution  
549 interpolated climate surfaces for global land areas. *International Journal of Climatology*, 25(15),  
550 1965–1978. <https://doi.org/10.1002/joc.1276>

- 551 Joost, S., Bonin, A., Bruford, M. W., Després, L., Conord, C., Erhardt, G., & Taberlet, P. (2007). A spatial  
552 analysis method (SAM) to detect candidate loci for selection: Towards a landscape genomics  
553 approach to adaptation. *Molecular Ecology*, *16*(18), 3955–3969. [https://doi.org/10.1111/j.1365-](https://doi.org/10.1111/j.1365-294X.2007.03442.x)  
554 [294X.2007.03442.x](https://doi.org/10.1111/j.1365-294X.2007.03442.x)
- 555 Kruskal, W. H., & Wallis, W. A. (1952). Use of Ranks in One-Criterion Variance Analysis. *Journal of the*  
556 *American Statistical Association*, *47*(260), 583. <https://doi.org/10.2307/2280779>
- 557 Kullback, S., & Leibler, R. A. (1951). On Information and Sufficiency. *The Annals of Mathematical*  
558 *Statistics*, *22*(1), 79–86. <https://doi.org/10.1214/aoms/1177729694>
- 559 Landguth, E. L., & Cushman, S. A. (2010). Cdpop: A spatially explicit cost distance population genetics  
560 program. *Molecular Ecology Resources*, *10*(1), 156–161. [https://doi.org/10.1111/j.1755-](https://doi.org/10.1111/j.1755-0998.2009.02719.x)  
561 [0998.2009.02719.x](https://doi.org/10.1111/j.1755-0998.2009.02719.x)
- 562 Laporte, M., Pavey, S. A., Rougeux, C., Pierron, F., Lauzent, M., Budzinski, H., ... Bernatchez, L. (2016).  
563 RAD sequencing reveals within-generation polygenic selection in response to anthropogenic  
564 organic and metal contamination in North Atlantic Eels. *Molecular Ecology*, *25*(1), 219–237.  
565 <https://doi.org/10.1111/mec.13466>
- 566 Leempoel, K., Duruz, S., Rochat, E., Widmer, I., Orozco-terWengel, P., & Joost, S. (2017). Simple Rules for  
567 an Efficient Use of Geographic Information Systems in Molecular Ecology. *Frontiers in Ecology and*  
568 *Evolution*, *5*, 33. <https://doi.org/10.3389/fevo.2017.00033>
- 569 Lotterhos, K. E., & Whitlock, M. C. (2015). The relative power of genome scans to detect local adaptation  
570 depends on sampling design and statistical method. *Molecular Ecology*, *24*(5), 1031–1046.  
571 <https://doi.org/10.1111/mec.13100>
- 572 Lowry, D. B. (2012). Local adaptation in The model plant. *New Phytologist*, *194*(4), 888–890.  
573 <https://doi.org/10.1111/j.1469-8137.2012.04146.x>

- 574 Luikart, G., England, P. R., Tallmon, D., Jordan, S., & Taberlet, P. (2003). The power and promise of  
575 population genomics: from genotyping to genome typing. *Nature Reviews. Genetics*, 4(12), 981–  
576 994. <https://doi.org/10.1038/nrg1226>
- 577 Lv, F.-H., Agha, S., Kantanen, J., Colli, L., Stucki, S., Kijas, J. W., ... Ajmone Marsan, P. (2014). Adaptations  
578 to Climate-Mediated Selective Pressures in Sheep. *Molecular Biology and Evolution*, 31(12), 3324–  
579 3343. <https://doi.org/10.1093/molbev/msu264>
- 580 Manel, S., Albert, C. H., & Yoccoz, N. G. (2012). Sampling in Landscape Genomics (pp. 3–12). Humana  
581 Press, Totowa, NJ. [https://doi.org/10.1007/978-1-61779-870-2\\_1](https://doi.org/10.1007/978-1-61779-870-2_1)
- 582 Manel, S., Joost, S., Epperson, B. K., Holderegger, R., Storfer, A., Rosenberg, M. S., ... Fortin, M. J. (2010).  
583 Perspectives on the use of landscape genetics to detect genetic adaptive variation in the field.  
584 *Molecular Ecology*, 19(17), 3760–3772. <https://doi.org/10.1111/j.1365-294X.2010.04717.x>
- 585 Mangiafico, S. (2019). rcompanion: Functions to Support Extension Education Program Evaluation.
- 586 Mantel, N. (1967). The detection of disease clustering and a generalized regression approach. *Cancer*  
587 *Research*, 27(2), 209–220. Retrieved from <http://www.ncbi.nlm.nih.gov/pubmed/6018555>
- 588 Manthey, J. D., & Moyle, R. G. (2015). Isolation by environment in White-breasted Nuthatches ( *Sitta*  
589 *carolinensis* ) of the Madrean Archipelago sky islands: a landscape genomics approach. *Molecular*  
590 *Ecology*, 24(14), 3628–3638. <https://doi.org/10.1111/mec.13258>
- 591 Marshall, R. J. (1989). The Predictive Value of Simple Rules for Combining Two Diagnostic Tests.  
592 *Biometrics*, 45(4), 1213. <https://doi.org/10.2307/2531772>
- 593 Mckerns, M. M., Strand, L., Sullivan, T., Fang, A., & Aivazis, M. A. G. (2011). *Building a Framework for*  
594 *Predictive Science. PROC. OF THE 10th PYTHON IN SCIENCE CONF.* Retrieved from  
595 <https://arxiv.org/abs/1202.1056>

- 596 McKinney, W. (2010). Data Structures for Statistical Computing in Python. Retrieved from  
597 <http://conference.scipy.org/proceedings/scipy2010/mckinney.html>
- 598 Nathan, R. (2006). Long-distance dispersal of plants. *Science (New York, N.Y.)*, *313*(5788), 786–788.  
599 <https://doi.org/10.1126/science.1124975>
- 600 Novembre, J., Johnson, T., Bryc, K., Kutalik, Z., Boyko, A. R., Auton, A., ... Bustamante, C. D. (2008). Genes  
601 mirror geography within Europe. *Nature*, *456*(7218), 98–101. <https://doi.org/10.1038/nature07331>
- 602 Pardo-Diaz, C., Salazar, C., & Jiggins, C. D. (2015). Towards the identification of the loci of adaptive  
603 evolution. *Methods in Ecology and Evolution*, *6*(4), 445–464. [https://doi.org/10.1111/2041-](https://doi.org/10.1111/2041-210X.12324)  
604 [210X.12324](https://doi.org/10.1111/2041-210X.12324)
- 605 Pariset, L., Joost, S., Marsan, P., & Valentini, A. (2009). Landscape genomics and biased FST approaches  
606 reveal single nucleotide polymorphisms under selection in goat breeds of North-East  
607 Mediterranean. *BMC Genetics*, *10*(1), 7. <https://doi.org/10.1186/1471-2156-10-7>
- 608 Patterson, N., Price, A. L., & Reich, D. (2006). Population structure and eigenanalysis. *PLoS Genetics*,  
609 *2*(12), 2074–2093. <https://doi.org/10.1371/journal.pgen.0020190>
- 610 Pluess, A. R., Frank, A., Heiri, C., Lalagüe, H., Vendramin, G. G., & Oddou-Muratorio, S. (2016). Genome-  
611 environment association study suggests local adaptation to climate at the regional scale in *Fagus*  
612 *sylvatica*. *New Phytologist*, *210*(2), 589–601. <https://doi.org/10.1111/nph.13809>
- 613 Python Software Foundation. (2018). Python Language Reference, version 3.5. Retrieved from  
614 [www.python.org](http://www.python.org)
- 615 QGIS development team. (2009). QGIS Geographic Information System. Open Source Geospatial  
616 Foundation Project. Retrieved from <http://www.qgis.org/>
- 617 R Core Team. (2016). R: A Language and Environment for Statistical Computing. Retrieved from



- 618 <https://www.r-project.org/>
- 619 Ray, N., Currat, M., Foll, M., & Excoffier, L. (2010). SPLATCHE2: a spatially explicit simulation framework  
620 for complex demography, genetic admixture and recombination. *Bioinformatics*, 26(23), 2993–  
621 2994. <https://doi.org/10.1093/bioinformatics/btq579>
- 622 Rellstab, C., Gugerli, F., Eckert, A. J., Hancock, A. M., & Holderegger, R. (2015). A practical guide to  
623 environmental association analysis in landscape genomics. *Molecular Ecology*, 24(17), 4348–4370.  
624 <https://doi.org/10.1111/mec.13322>
- 625 Riginos, C., Crandall, E. D., Liggins, L., Bongaerts, P., & Tremblay, E. A. (2016). Navigating the currents of  
626 seascape genomics: how spatial analyses can augment population genomic studies. *Current*  
627 *Zoology*, 62, doi: 10.1093/cz/zow067. <https://doi.org/10.1093/cz/zow067>
- 628 Ryan, W. B. F., Carbotte, S. M., Coplan, J. O., O’Hara, S., Melkonian, A., Arko, R., ... Zemsky, R. (2009).  
629 Global Multi-Resolution Topography synthesis. *Geochemistry, Geophysics, Geosystems*, 10(3), n/a-  
630 n/a. <https://doi.org/10.1029/2008GC002332>
- 631 Seabold, S., & Perktold, J. (2010). Statsmodels: econometric and statistical modeling with Python. In *9th*  
632 *Python in Science Conference* (pp. 57–61). Retrieved from <http://statsmodels.sourceforge.net/>
- 633 Statisticat, & LCC. (2018). LaplacesDemon: Complete Environment for Bayesian Inference. Bayesian-  
634 Inference.com.
- 635 Storey, J. D. (2003). The Positive False Discovery Rate: A Bayesian Interpretation and the q-Value. *Annals*  
636 *of Statistics*, 31(6), 2013–2035.
- 637 Stronen, A. V., Jędrzejewska, B., Pertoldi, C., Demontis, D., Randi, E., Niedziałkowska, M., ... Czarnomska,  
638 S. D. (2015). Genome-wide analyses suggest parallel selection for universal traits may eclipse local  
639 environmental selection in a highly mobile carnivore. *Ecology and Evolution*, 5(19), 4410–4425.  
640 <https://doi.org/10.1002/ece3.1695>

- 641 Stucki, S., Orozco-terWengel, P., Bruford, M. W., Colli, L., Masembe, C., Negrini, R., ... Consortium, the N.  
642 (2017). High performance computation of landscape genomic models integrating local indices of  
643 spatial association. *Molecular Ecology Resources*, 17(5), 1072–1089. [https://doi.org/10.1111/1755-](https://doi.org/10.1111/1755-0998.12629)  
644 0998.12629
- 645 Theodorou, P., Radzevičiūtė, R., Kahnt, B., Soro, A., Grosse, I., & Paxton, R. J. (2018). Genome-wide  
646 single nucleotide polymorphism scan suggests adaptation to urbanization in an important  
647 pollinator, the red-tailed bumblebee (*Bombus lapidarius* L.). *Proceedings of the Royal Society B:*  
648 *Biological Sciences*, 285(1877), 20172806. <https://doi.org/10.1098/rspb.2017.2806>
- 649 Tomczak, M. T., & Tomczak, E. (2014). The need to report effect size estimates revisited. An overview of  
650 some recommended measures of effect size. *Trends in Sport Sciences*, 21(1). Retrieved from  
651 [https://www.semanticscholar.org/paper/The-need-to-report-effect-size-estimates-revisited.-](https://www.semanticscholar.org/paper/The-need-to-report-effect-size-estimates-revisited.-Tomczak-Tomczak/8c08127f9e736e8db15bec81d69f547d672f9f58)  
652 Tomczak-Tomczak/8c08127f9e736e8db15bec81d69f547d672f9f58
- 653 Vajana, E., Barbato, M., Colli, L., Milanese, M., Rochat, E., Fabrizi, E., ... Ajmone Marsan, P. (2018).  
654 Combining landscape genomics and ecological modelling to investigate local adaptation of  
655 indigenous Ugandan cattle to East Coast fever. *Frontiers in Genetics*, 9, 385.  
656 <https://doi.org/10.3389/FGENE.2018.00385>
- 657 Vincent, B., Dionne, M., Kent, M. P., Lien, S., & Bernatchez, L. (2013). Landscape genomics in atlantic  
658 salmon (*salmo salar*): Searching for gene-environment interactions driving local adaptation.  
659 *Evolution*, 67(12), 3469–3487. <https://doi.org/10.1111/evo.12139>
- 660 Wang, L., Zhang, W., Li, Q., & Zhu, W. (2017). AssocTests: Genetic Association Studies.
- 661 Weir, B. S., & Cockerham, C. C. (1984). Estimating F-Statistics for the Analysis of Population Structure.  
662 *Evolution*, 38(6), 1358. <https://doi.org/10.2307/2408641>
- 663 Wenzel, M. A., Douglas, A., James, M. C., Redpath, S. M., & Piertney, S. B. (2016). The role of parasite-

664 driven selection in shaping landscape genomic structure in red grouse ( *Lagopus lagopus scotica* ).

665 *Molecular Ecology*, 25(1), 324–341. <https://doi.org/10.1111/mec.13473>

666 Yoder, J. B., Stanton-Geddes, J., Zhou, P., Briskine, R., Young, N. D., & Tiffin, P. (2014). Genomic Signature  
667 of Adaptation to Climate in *Medicago truncatula*. *Genetics*, 196(4), 1263–1275.

668 <https://doi.org/10.1534/genetics.113.159319>

669

#### 670 **Data Accessibility Statement**

671 All scripts and data used to perform this analysis are publicly available on Dryad (doi:10.5061/dryad.m16d23c).

672

#### 673 **Author Contributions**

674 OS and SJ designed research, OS performed research, OS, EV, AG, ER and SJ analyzed the results and

675 wrote the paper. All the authors undertook revisions, contributed intellectually to the development of

676 this manuscript and approved the final manuscript.

677

678

679

680 **Tables and Figures**

681 **Table 1. Sampling design in landscape genomics studies.** A non-exhaustive list of landscape genomics studies, highlighting  
 682 different species and their related sampling strategies.

683 \* Numbers from the Vincent et al. report (2013) concerning the *non-pooled* samples.

| Study                                  | Species              | Sampling Design (D)                          | Sampling Locations | Sample Size |
|----------------------------------------|----------------------|----------------------------------------------|--------------------|-------------|
|                                        |                      |                                              | (L)                | (S)         |
| Colli et al. 2014                      | Goat                 | Spatial and breed representativeness         | 10 sites           | 43          |
| Pariset et al. 2009                    | Goat                 | Spatial and breed representativeness         | 16 regions         | 497         |
| Stucki et al. 2017, Vajana et al. 2018 | Cattle               | Spatial representativeness                   | 51 regions         | 813         |
| Harris and Munshi-South, 2017          | White-footed Mouse   | Habitat representativeness                   | 6 sites            | 48          |
| Stronen et al., 2015                   | Wolf                 | Opportunistic, population representativeness | 59 sites           | 59          |
| Wenzel et al., 2016                    | Red Grouse           | Spatial representativeness                   | 21 sites           | 231         |
| Crossley et al., 2017                  | Potato Beetle        | Habitat representativeness                   | 16 sites           | 192         |
| Dudaniec et al., 2018                  | Damselfly            | Environmental and spatial representativeness | 25 sites           | 426         |
| Theodorou et al., 2018                 | Red-tailed bumblebee | Habitat representativeness                   | 18 sites           | 198         |
| Abebe et al., 2015                     | Barley               | Spatial representativeness                   | 10 regions         | 260         |
| De Kort et al., 2014                   | Black alder          | Spatial and habitat representativeness       | 24 populations     | 356         |
| Pluess et al., 2016                    | European beech       | Spatial and environmental representativeness | 79 populations     | 234         |
| Yoder et al., 2014                     | Barrelclover         | Spatial representativeness                   | 202 sites          | 202         |
| DiBattista et al., 2017                | Stripey Snapper      | Spatial representativeness                   | 51 sites           | 1,016       |
| Hecht et al., 2015                     | Chinook salmon       | Spatial representativeness                   | 53 sites           | 1,956       |
| Laporte et al., 2016                   | European Eel         | Spatial and environmental representativeness | 8 sites            | 179         |
| Vincent et al., 2013                   | Atlantic Salmon      | Spatial representativeness                   | 26* rivers         | 641*        |

684 **Figure 1. Workflow for each iteration of the simulative approach.** The seven steps taken for every iteration. Starting with the  
685 blue boxes, the genetic set-up is established by selecting the demographic scenario (panmictic or structured), which determines  
686 the neutral structure, and by picking the environmental variables implied in adaptation. The environmental variable of interest  
687 and the strength of selection is randomly sampled for each of the 10 adaptive markers. Following this, the sampling strategy (here  
688 shown with red boxes) is set as a combination of design approach (geographic, environmental, hybrid or random), number of  
689 sampling locations (5, 10, 20, 40 or 50 locations) and sample size (50, 100, 200, 400, 800 or 1600 samples). This results in the  
690 creation of a genotype matrix that undergoes a landscape genomics analysis. At the end of iterations, statistical power (TPR) and  
691 false discovery rate (FDR) of the analysis and statistical predictive positive value of the strongest associations (PPV) are calculated  
692 to assess the performance of the sampling strategy.

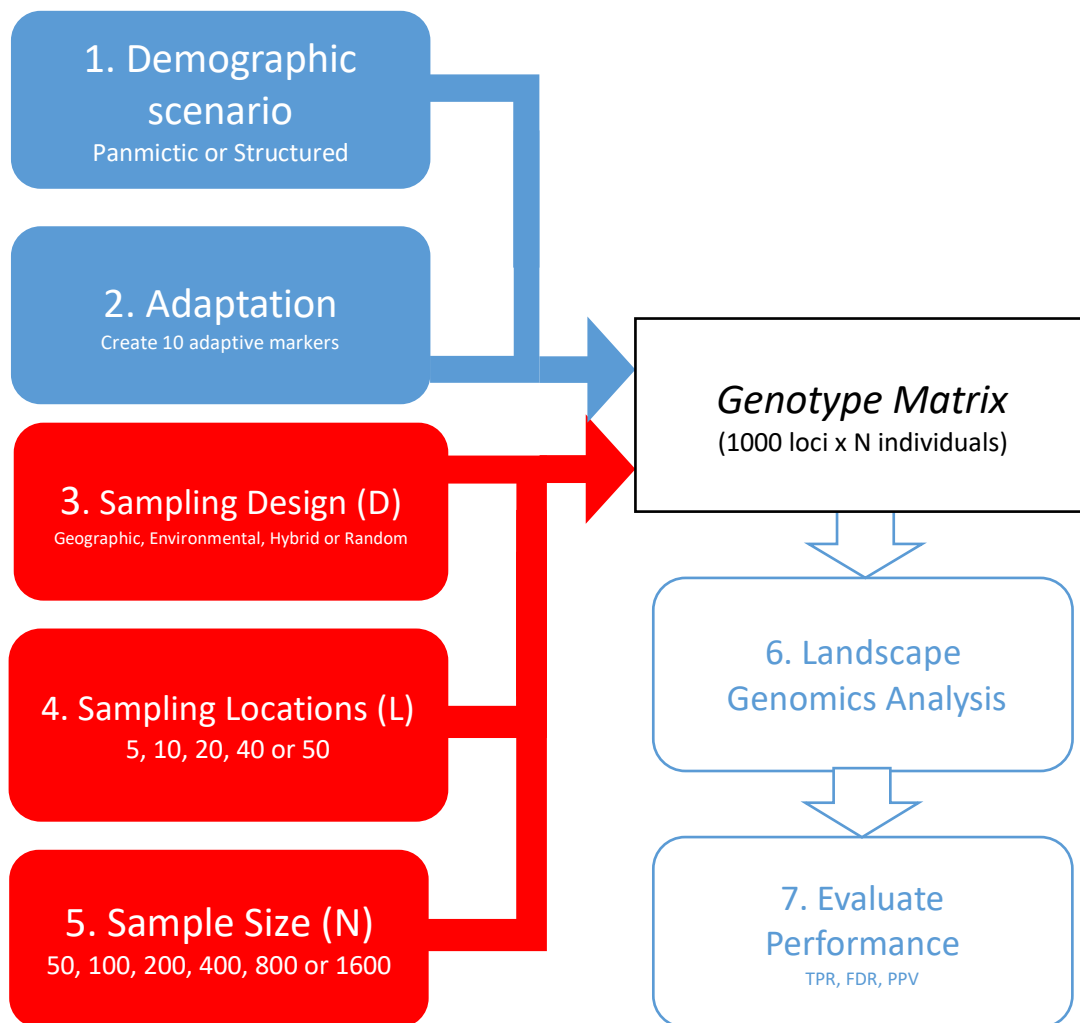

693

694 **Figure 2. Comparison of genotypes simulated with CDPOP and our method.** Two distinct demographic scenarios were conceived,  
 695 one with random mating (panmictic population) and one with dispersal costs related to distance (structured population). For  
 696 each of them, CDPOP simulated the evolution of the population over 100 generations (red graphs) and replicated the same  
 697 scenario 10 times. Simultaneously, we replicated the same scenarios using our simulative approach and show here the closest  
 698 match (also replicated 10 times) to CDPOP simulations (blue graphs). Five methods for evaluating the genetic makeup are  
 699 presented. In a), a principal component analysis is applied to the genotype matrix and the differential of the percentage of  
 700 explained variation by each component is plotted for every replicate. In b), a pairwise  $F_{st}$  analysis between five subpopulations  
 701 is performed for every replicate and the resulting distribution of  $F_{st}$  is shown. In c), Mantel correlation is calculated between a  
 702 matrix of genetic and of geographic distances. The resulting Mantel R for every replicate is shown. In d) and e), the allelic  
 703 frequency of adaptive genotypes is shown as a function of the environmental variables causing selection (representing a case of  
 704 moderate and strong selection, respectively).

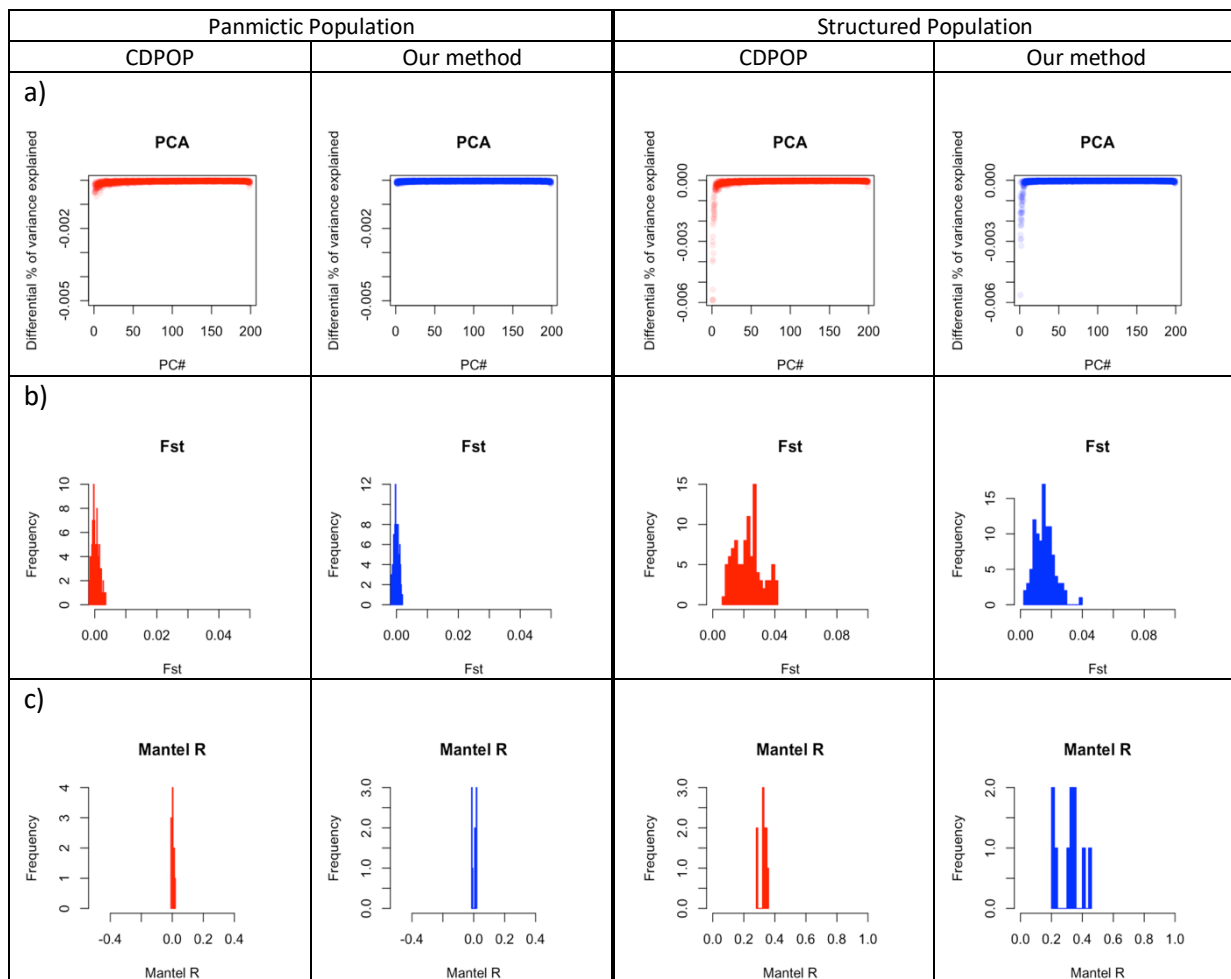

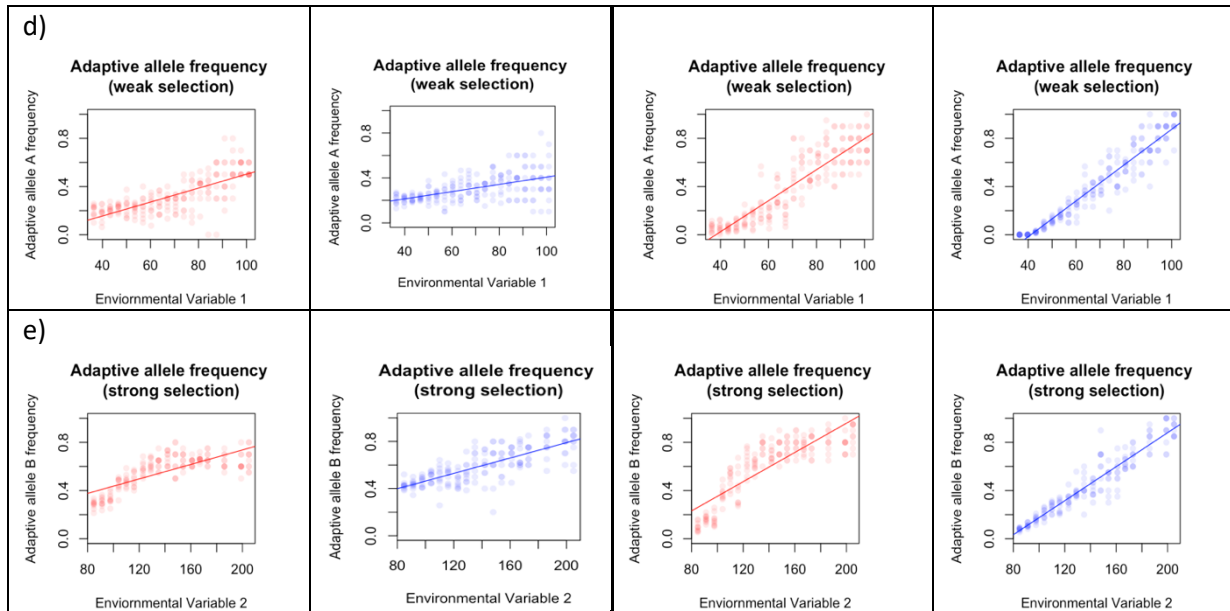

705

706 **Figure 3. The three sampling design approaches accounting for landscape characteristics.** The three maps illustrate how the  
707 eight sampling sites are chosen under three different sampling designs. Under a geographic strategy (A), sample location is  
708 selected using only geographic coordinates in order to maximize distance between sites. The environmental design (B) is  
709 computed using environmental variables (after filtering out highly correlated variables), in order to maximize the climatic distance  
710 between the chosen sites. The hybrid strategy (C) is a combination of the first two designs: first the landscape is divided into  
711 distinct environmental regions before choosing sites within each region that maximize spatial distance.

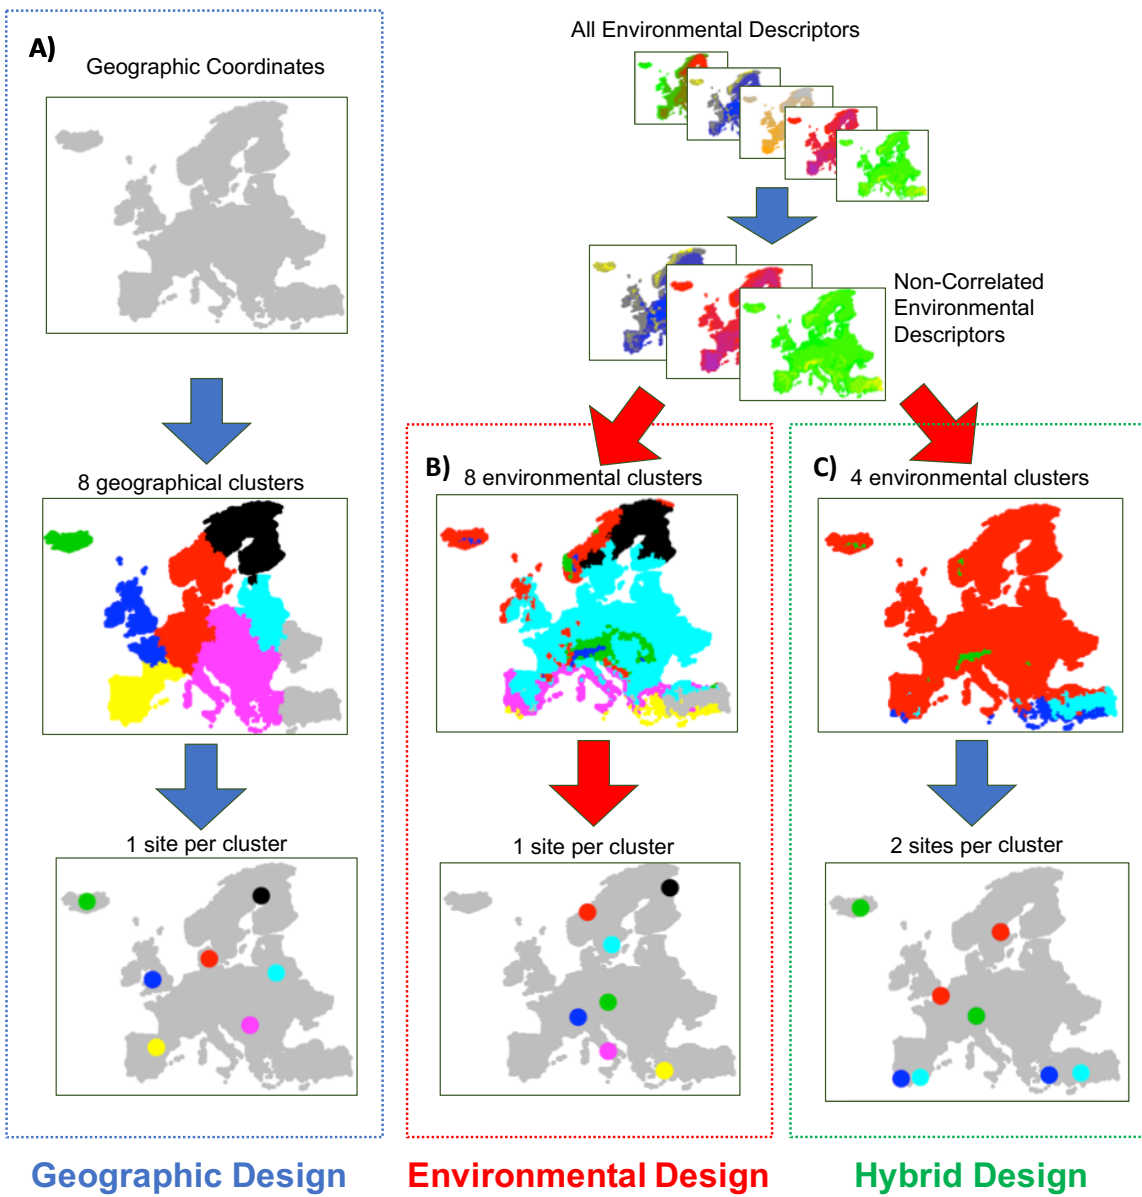

712

713



714 **Table 2. Table of factors varying in the simulative approach.** Two different demographic scenarios are possible, one in which  
715 there is no neutral genetic structure (panmictic population) and one in which there is a structured variation (structured  
716 population). We then used sampling strategies emulating those observed in real experiments. Three different sampling design  
717 approaches accounting for landscape characteristics are proposed: one maximizing the spatial representativeness of samples  
718 (geographic), one maximizing the environmental representativeness (environmental) and one that is a combination of both  
719 (hybrid). A fourth sampling design picks sampling locations randomly. The numerical ranges we employed were comparable to  
720 those from real experiment: 5 levels for number of sampling locations spanning from 5 to 50 sites, and 6 levels of sample sizes  
721 (i.e. total number of samples) from 50 to 1600 samples. For each combination of the aforementioned factors, 20 replicates were  
722 computed differing in the number and types of selective forces driving adaptation. In total, 4,800 simulation were computed.

| <b>Factor</b>                   | <b># levels</b> | <b>Levels</b>                               |
|---------------------------------|-----------------|---------------------------------------------|
| Demographic Scenarios           | 2               | Panmictic Population, Structured Population |
| Sampling Design ( <i>D</i> )    | 4               | Geographic, Environmental, Hybrid, Random   |
| Sampling Locations ( <i>L</i> ) | 5               | 5, 10, 20, 40, 50                           |
| Sampling Size ( <i>N</i> )      | 6               | 50, 100, 200, 400, 800, 1600                |
| Replicates                      | 20              |                                             |
| Total                           | 4800            |                                             |

723

724

725

726 **Table 3. Results of Kruskal-Wallis (KW) rank analysis.** The table shows the epsilon-squared ( $E^2$ ) coefficient associated to the KW  
 727 test for the three diagnostic parameters of the analysis (TPR: true positive rate, a-c; FDR: false discovery rate, d-f; PPV: positive  
 728 predictive value of among the ten strongest significant association models, g-i) for every element determining the sampling  
 729 strategy (sampling design: a, d, g; number of locations: b, e, h; sample size: c, f, i) under the two demographic scenarios, panmictic  
 730 and structured population.  $E^2$  ranges between 0 and 1, where the higher the value the stronger the sampling strategy element  
 731 drives the differences in the diagnostic parameter. The asterisks represent the respective degree of significance of the KW test  
 732 (\*:  $p < 0.01$ , \*\*:  $p < 0.01$ , \*\*\*:  $p < 0.001$ , \*\*\*\*  $p < 0.0001$ , \*\*\*\*\*  $p < 0.00001$ ).

| a) Sampling Design |             | b) # of Sampling Locations |            | c) Sample Size |            |
|--------------------|-------------|----------------------------|------------|----------------|------------|
| Panmictic          | Structured  | Panmictic                  | Structured | Panmictic      | Structured |
| 0.0163*****        | 0.0229***** | 0.00766*                   | 0.17*****  | 0.815*****     | 0.613***** |
| d) Sampling Design |             | e) # of Sampling Locations |            | f) Sample Size |            |
| Panmictic          | Structured  | Panmictic                  | Structured | Panmictic      | Structured |
| 0.00122            | 0.00733**   | 0.0116***                  | 0.127***** | 0.621*****     | 0.408***** |
| g) Sampling Design |             | h) # of Sampling Locations |            | i) Sample Size |            |
| Panmictic          | Structured  | Panmictic                  | Structured | Panmictic      | Structured |
| 0.00226            | 0.0264***** | 0.0124****                 | 0.19*****  | 0.63*****      | 0.381***** |

733

734

735

736

737 **Figure 4. Effects of sampling strategy on the landscape genomics simulations.** The plots display how the performance of  
 738 landscape genomics experiments is driven by changes in the elements defining the sampling strategy. Three diagnostic  
 739 parameters are used to measure the performance of each strategy: true positive rate (TPR; a-c) and false discovery rate (FDR; d-  
 740 f) for the analysis and the positive predictive value of the ten strongest significant association models (PPV; g-i). For each  
 741 diagnostic parameter, we show the effect of sampling design (a, d, g; ran=random, geo=geographic, env=environmental, hyb=  
 742 hybrid), number of sampling locations (b, e, h; 5, 10, 20, 40 or 50 sites) and sample size (c, f, i; 50, 100, 200, 400, 800, 1600  
 743 individuals) under two demographic scenarios: panmictic and structured population.

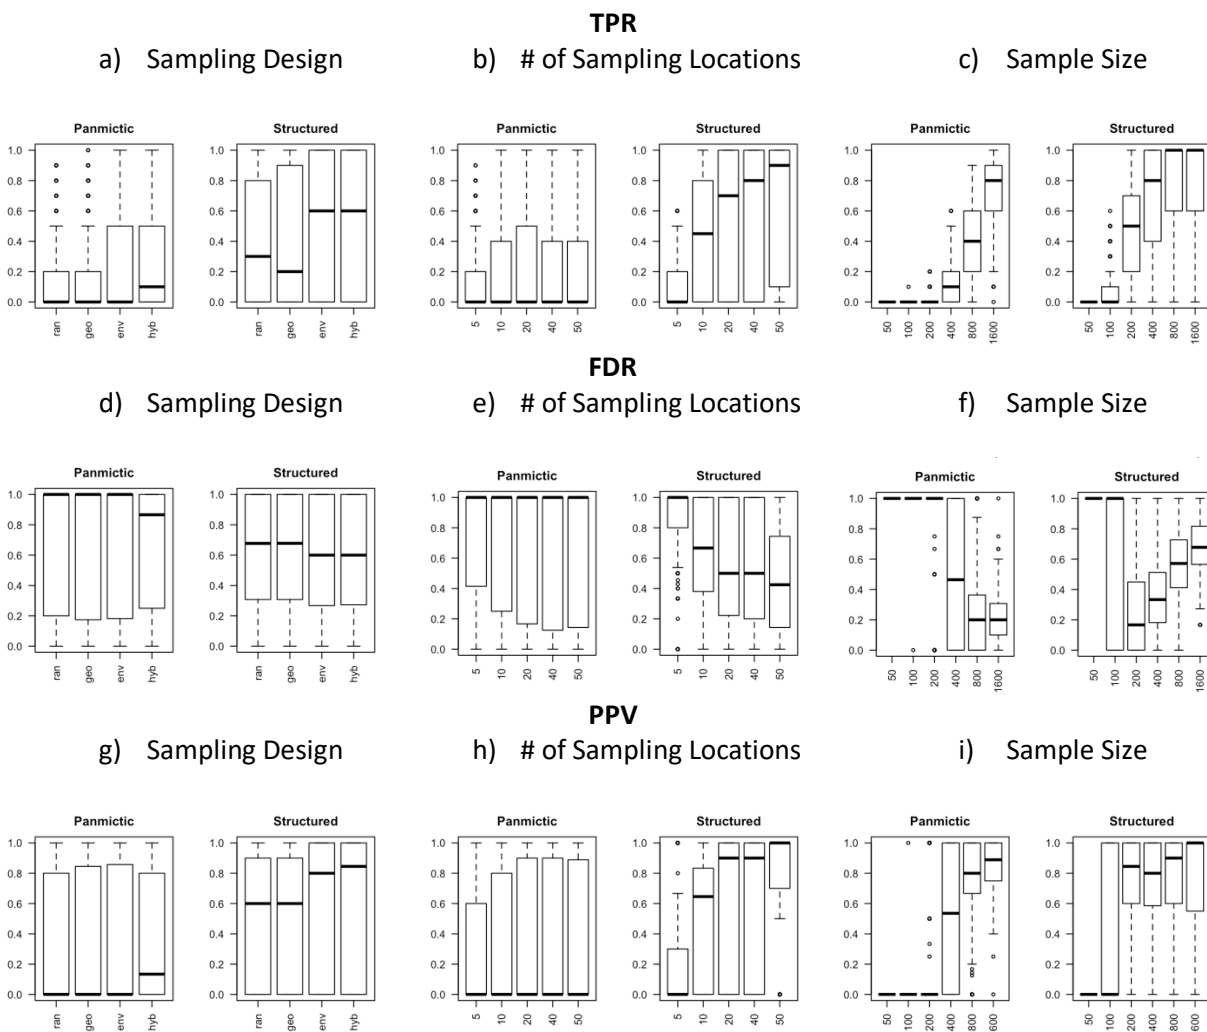

744

# MOLECULAR ECOLOGY RESOURCES

**Supplemental Information for:**

## **Sampling strategy optimization to increase statistical power in landscape genomics: a simulation-based approach**

Oliver Selmoni, Elia Vajana, Annie Guillaume, Estelle Rochat, Stéphane Joost

# MOLECULAR ECOLOGY RESOURCES

## Supplementary Tab. 1. List of environmental variables employed.

| Name                                | Geographic resolution | Source                                     |
|-------------------------------------|-----------------------|--------------------------------------------|
| Annual Mean Temperature             | 2.5 minutes           | Bioclim <sup>1</sup> (BIO1)                |
| Mean Diurnal Range                  | 2.5 minutes           | Bioclim <sup>1</sup> (BIO2)                |
| Temperature Seasonality             | 2.5 minutes           | Bioclim <sup>1</sup> (BIO4)                |
| Mean Temperature of Wettest Quarter | 2.5 minutes           | Bioclim <sup>1</sup> (BIO8)                |
| Annual Precipitation                | 2.5 minutes           | Bioclim <sup>1</sup> (BIO12)               |
| Precipitation Seasonality           | 2.5 minutes           | Bioclim <sup>1</sup> (BIO15)               |
| Precipitation of Warmest Quarter    | 2.5 minutes           | Bioclim <sup>1</sup> (BIO18)               |
| Altitude                            | 100 m                 | Marine Geoscience Data System <sup>2</sup> |

1. WorldClim - Global Climate Data | Free climate data for ecological modeling and GIS. Available at: <http://www.worldclim.org/>. (Accessed: 26th September 2018)

2. MGDS. Global Multi-Resolution Topography Data Synthesis. Available at: <http://www.marine-geo.org/portals/gmrt/>. (Accessed: 22nd August 2017)

# MOLECULAR ECOLOGY RESOURCES

**Supplementary Box 1. Computation of the genotype matrix.** The vignettes describe how genotypes were computed during simulations. At each iteration, a new genotype matrix counting 1'000 loci was generated. Ten of them were set as adaptive and followed the respective pipeline, while the others were set as neutral and computed accordingly.

## A) Neutral Locus

- i. An artificial population membership coefficient is computed as the distance from randomly located population centers. The membership coefficient is extracted then at each sampling site.

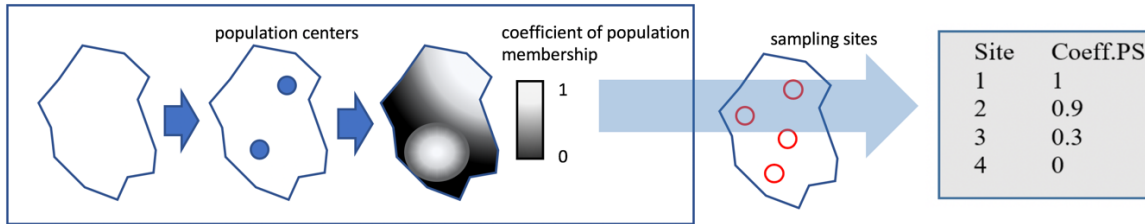

- ii. A function translates the coefficient of population structure in the probability of carrying the allele characteristic of the population. Finally, alleles are sampled at each site using the probability associated. This step is reiterated if more than one individual is sampled at the same site and for all the loci related to a same population membership coefficient.

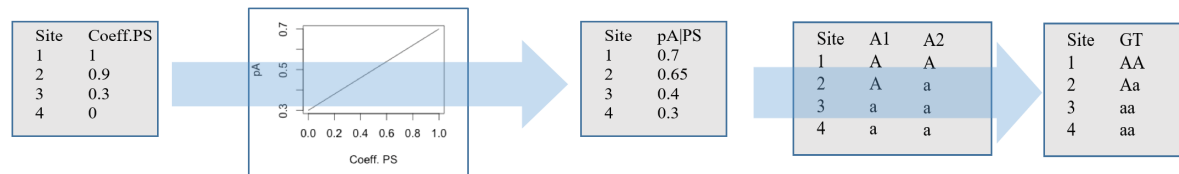

## B) Adaptive Locus

- i. For each sampling site, the environmental values are extracted.

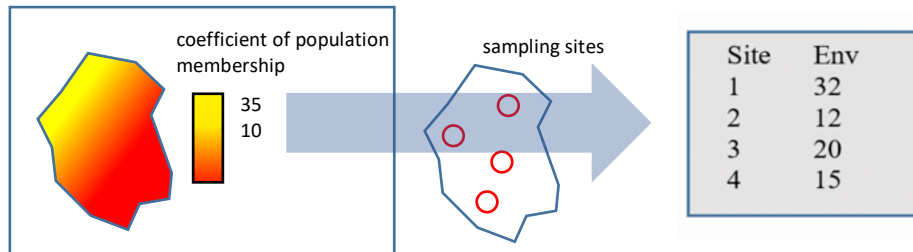

- ii. A function computes the probability of carrying an allele conferring a selective advantage against the environmental condition. Alleles are sampled at each site using the probability associated. This step is reiterated if more than one individual is sampled at the same site.

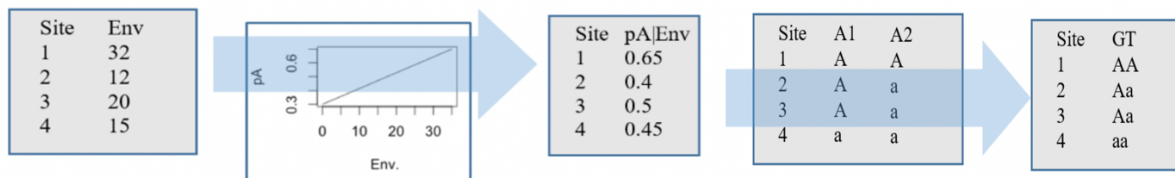

# MOLECULAR ECOLOGY RESOURCES

## Supplementary Box 2. Formulae and parameters for genotype computations

The probability function for the allele A depending on a population membership coefficient is calculated as follows:

$$p(A|PS) = \left( \frac{1 - 2c}{\max(PS) - \min(PS)} \right) PS + c - \left( \frac{1 - 2c}{\max(PS) - \min(PS)} \right) \min(PS)$$

where  $PS$  is a population membership coefficient and  $c$  a parameter representing the strength of the relationship. This parameter can range between 0 (strongest relation, *i.e.* maximal and minimal  $PS$  returns  $p=1$  and  $p=0$ , respectively) and 0.5 (no relation, any level of  $PS$  returns  $p=0.5$ ).

Similarly, probability for the allele A depending on environmental selection is calculated as follows:

$$p(A|Env) = \left( \frac{1 - 2s_1}{\max(Env) - \min(Env)} \right) E + s_1 - \left( \frac{1 - 2s_1}{\max(Env) - \min(Env)} \right) \min(Env) + s_2$$

where  $Env$  are the values of the environmental variable and  $s_1$  represents the strength of selection and behaves as the  $c$  in the previous equation. The additional parameter  $s_2$  provides a baseline of allele frequency.

In our simulations, we set two scenarios employing the following parameters:

- *panmictic population scenario* (random neutral structure):  $c=0.5$ ,  $s_1=Unif(0.3, 0.4)$ ,  $s_2=Unif(-0.2,0.1)$
- *structured population scenario* (strong population structure):  $c=Unif(0.2,0.4)$ ,  $s_1=0$ ,  $s_2=Unif(-0.1,0.2)$

# MOLECULAR ECOLOGY RESOURCES

**Supplementary Figure 1. Environmental gradients and fitness constraint employed in the CDPOP validation run.** Panel a) and b) show the distribution of the two environmental variables across the 10-by-10 cells grid used for the CDPOP simulation. Plots in panels c) and d) show the fitness constraint set for the two environmental variables and how the respective adaptive genotypes modulate mortality.

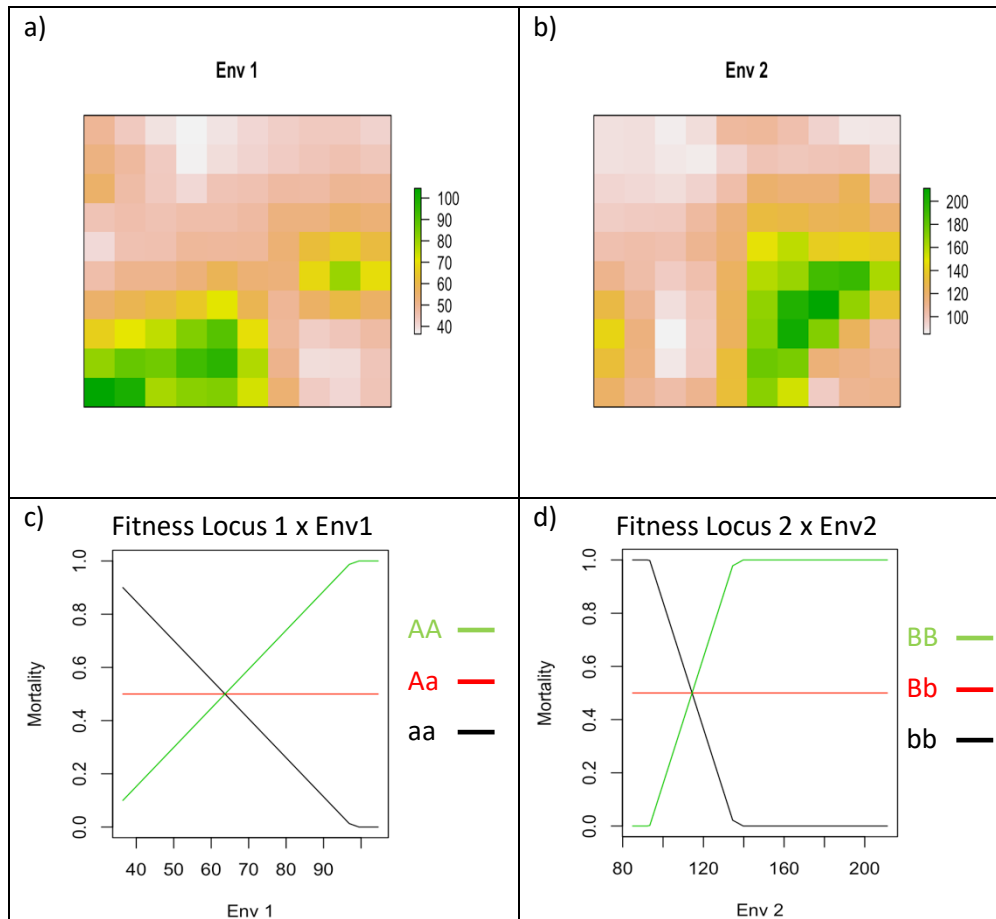



# MOLECULAR ECOLOGY RESOURCES

**Supplementary Table 2. CDPOP vs. our simulative approach comparison metrics.** The tables show the rank of the simulative variants computed with our method (and defined by parameters  $m$ ,  $c$ ,  $s_1$  and  $s_2$ ) that best matched the CDPOP replicates. In a) and b) are shown the metrics used to compare the neutral genetic structure with the CDPOP case of a panmictic population and a structured population, respectively. The three metrics employed are 1) the average random mean squared error (RMSE) when comparing the curves describing the differential of explained variation by the genetic principal components; 2) the Kullback-Leibler Divergence (KLD) used to compare the pairwise- $F_{st}$  distributions; 3) the difference in the average mantel correlation ( $\Delta mR$ ), which describes the link between genetic and geographic distances. The ranking coefficient is the sum of the three scaled metrics. In c) and d) the comparison concerns the adaptive genotypes computed in panmictic structured scenario of CDPOP, respectively. Here the RMSE compares, for our simulation and CDPOP runs, the allelic frequency of the adaptive genotype as a function of the environmental variable causing adaptation

## a) Panmictic Scenario: Neutral structure metrics

| rank | $m$ | $c$     | RMSE (PCA)  | KLD (Fst) | $\Delta mR$ | Ranking Coefficient |
|------|-----|---------|-------------|-----------|-------------|---------------------|
| 1    | 1   | 0.5     | 0.000780575 | 7.33E-06  | 0.003577    | -4.35661            |
| 2    | 25  | 0.4-0.5 | 0.000771722 | 7.70E-06  | 0.022455    | -4.25828            |
| 3    | 10  | 0.4-0.5 | 0.000771901 | 7.93E-06  | 0.023357    | -4.24377            |
| 4    | 20  | 0.4-0.5 | 0.000780659 | 8.58E-06  | 0.022308    | -4.21677            |
| 5    | 5   | 0.4-0.5 | 0.000770043 | 7.46E-06  | 0.034877    | -4.21321            |
| 6    | 15  | 0.4-0.5 | 0.000766353 | 9.31E-06  | 0.025071    | -4.17643            |
| 7    | 5   | 0.4-0.4 | 0.000796873 | 1.15E-05  | 0.067273    | -3.88113            |
| 8    | 10  | 0.4-0.4 | 0.000763216 | 1.12E-05  | 0.074199    | -3.87217            |
| 9    | 25  | 0.4-0.4 | 0.000771422 | 1.27E-05  | 0.072328    | -3.81237            |
| 10   | 20  | 0.4-0.4 | 0.000761967 | 1.38E-05  | 0.073625    | -3.7593             |

## b) Structured Scenario: Neutral structure metrics

| rank | $m$ | $c$     | RMSE (PCA)  | KLD (Fst) | $\Delta mR$ | Ranking Coefficient |
|------|-----|---------|-------------|-----------|-------------|---------------------|
| 1    | 10  | 0.2-0.4 | 0.00290909  | 8.17E-06  | 0.320549    | -3.63827            |
| 2    | 20  | 0.1-0.5 | 0.00266099  | 8.85E-06  | 0.339198    | -3.63027            |
| 3    | 5   | 0.3     | 0.003023145 | 8.38E-06  | 0.312132    | -3.45645            |
| 4    | 15  | 0.1-0.5 | 0.002793301 | 7.57E-06  | 0.37057     | -3.43066            |
| 5    | 25  | 0.2-0.4 | 0.003250162 | 8.42E-06  | 0.314625    | -3.31517            |
| 6    | 15  | 0.2-0.3 | 0.002468453 | 6.72E-06  | 0.422087    | -3.31507            |
| 7    | 5   | 0.2-0.4 | 0.003092629 | 9.91E-06  | 0.329403    | -3.27752            |
| 8    | 10  | 0.3     | 0.002819477 | 9.84E-06  | 0.295631    | -3.26125            |
| 9    | 25  | 0.1-0.5 | 0.002947686 | 8.05E-06  | 0.373038    | -3.23848            |
| 10   | 15  | 0.2-0.5 | 0.002799946 | 1.02E-05  | 0.280361    | -3.09366            |

## c) Panmictic Scenario: adaptive genotypes metrics

| Moderate Selection |       |       |           |
|--------------------|-------|-------|-----------|
| rank               | $s_1$ | $s_2$ | RMSE (AF) |
| 1                  | 0     | -0.1  | 0.7417767 |
| 2                  | 0.1   | -0.1  | 0.75108   |
| 3                  | 0.1   | -0.2  | 0.7681983 |
| 4                  | 0     | -0.2  | 0.78917   |
| 5                  | 0.2   | -0.1  | 0.7946361 |
| Strong Selection   |       |       |           |
| rank               | $s_1$ | $s_2$ | RMSE (AF) |
| 1                  | 0     | 0.2   | 0.676855  |
| 2                  | 0.1   | 0.2   | 0.683247  |
| 3                  | 0.1   | 0     | 0.710474  |
| 4                  | 0     | 0.1   | 0.715619  |
| 5                  | 0.2   | 0.1   | 0.728321  |

## d) Structured Scenario: adaptive genotypes metrics

| Moderate Selection |       |       |           |
|--------------------|-------|-------|-----------|
| rank               | $s_1$ | $s_2$ | RMSE (AF) |
| 1                  | 0.4   | -0.2  | 0.6889893 |
| 2                  | 0.3   | -0.2  | 0.6895106 |
| 3                  | 0.2   | -0.2  | 0.7181186 |
| 4                  | 0.3   | -0.1  | 0.7319583 |
| 5                  | 0.2   | -0.1  | 0.7454251 |
| Strong Selection   |       |       |           |
| rank               | $s_1$ | $s_2$ | RMSE (AF) |
| 1                  | 0.3   | 0.1   | 0.624262  |
| 2                  | 0.4   | 0.1   | 0.6417665 |
| 3                  | 0.2   | 0.1   | 0.6484901 |
| 4                  | 0.3   | 0     | 0.6709922 |
| 5                  | 0.4   | 0     | 0.6831192 |

# MOLECULAR ECOLOGY RESOURCES

**Supplementary Table 3. Changes in the analysis results under different sampling strategy.** The table shows the changes in the median value of the three diagnostic parameters (TPR, FDR and PPV) used to evaluate the performance of the landscape genomics analysis. In a) the changes concern the different sampling design approaches (geo: geographic, env: environmental, hyb: hybrid) as compared to the random one. In b), the comparison focuses on the number of sampling locations showing, for a given range of locations, by how much an additional sampling site increases the median of the diagnostic parameter. In c) is shown, for a given interval of sample size, by how much the median of the diagnostic parameter is increased by an additional sample. The results for the two demographic scenarios, panmictic and structured, are shown separately.

|                              |          | TPR       |            | FDR       |            | PPV       |            |
|------------------------------|----------|-----------|------------|-----------|------------|-----------|------------|
|                              |          | Panmictic | Structured | Panmictic | Structured | Panmictic | Structured |
| a)<br>Sampling<br>Design     | Geo      | 0         | -0.1       | 0         | 0.000576   | 0         | 0          |
|                              | Env      | 0         | 0.3        | 0         | -0.07742   | 0         | 0.2        |
|                              | Hyb      | 0.1       | 0.3        | -0.13393  | -0.07742   | 0.133929  | 0.245238   |
| b)<br>Number of<br>Locations | 5-10     | 0         | 0.09       | 0         | -0.06667   | 0         | 0.129167   |
|                              | 10-10    | 0         | 0.025      | 0         | -0.01667   | 0         | 0.025417   |
|                              | 20-40    | 0         | 0.005      | 0         | 0          | 0         | 0          |
|                              | 40-50    | 0         | 0.01       | 0         | -0.00754   | 0         | 0.01       |
| c)<br>Sample<br>Size         | 50-100   | 0         | 0          | 0         | 0          | 0         | 0          |
|                              | 100-200  | 0         | 0.005      | 0         | -0.00833   | 0         | 0.008452   |
|                              | 200-400  | 0.0005    | 0.0015     | -0.00268  | 0.000833   | 0.002679  | -0.00023   |
|                              | 400-800  | 0.00075   | 0.0005     | -0.00066  | 0.000595   | 0.000661  | 0.00025    |
|                              | 800-1600 | 0.0005    | 0          | 0         | 0.000133   | 0.000111  | 0.000125   |
